# Supplementary material
Source: ML conference proceedings conference paper supplement (https://openreview.net/forum?id=kN4mGdGWc92)
Supplement: supplementary_material [file attachment]

---

# Practical Schemes for Finding Near-Stationary Points of Convex Finite-Sums

---

Anonymous Author(s)

Affiliation

Address

email

## Abstract

1 The problem of finding near-stationary points in convex optimization has not been  
2 adequately studied yet, unlike other optimality measures such as the function  
3 value. Even in the deterministic case, the optimal method (OGM-G, due to Kim  
4 and Fessler [33]) has just been discovered recently. In this work, we conduct a  
5 systematic study of algorithmic techniques for finding near-stationary points of  
6 convex finite-sums. Our main contributions are several algorithmic discoveries:  
7 (1) we discover a memory-saving variant of OGM-G based on the performance  
8 estimation problem approach [19]; (2) we design a new accelerated SVRG variant  
9 that can simultaneously achieve fast rates for minimizing both the gradient norm  
10 and function value; (3) we propose an adaptively regularized accelerated SVRG  
11 variant, which does not require the knowledge of some unknown initial constants  
12 and achieves near-optimal complexities. We put an emphasis on the simplicity and  
13 practicality of the new schemes, which could facilitate future developments.

## 14 1 Introduction

15 Classic convex optimization usually focuses on providing guarantees for minimizing function value.  
16 For this task, the optimal (up to constant factors) Nesterov’s accelerated gradient method (NAG)  
17 [40, 41] has been known for decades, and there are even methods that can exactly match the lower  
18 complexity bounds [30, 17, 55, 18]. On the other hand, in general non-convex optimization, near-  
19 stationarity is the typical optimality measure, and there has been a flurry of recent research devoted to  
20 this topic [25, 26, 23, 28, 21, 60]. Recently, there has been growing interest on devising fast schemes  
21 for finding near-stationary points in convex optimization [42, 2, 22, 7, 31, 32, 33, 27, 15, 14]. This  
22 line of research is basically driven by the following facts.

- 23 • Nesterov [42] studied the problem with a linear constraint:  $f(x^*) = \min_{x \in Q} \{f(x) : Ax = b\}$ ,  
24 where  $Q$  is a convex set and  $f$  is strongly convex. Assuming that  $Q$  and  $f$  are simple, we can focus  
25 on the dual problem  $\phi(y^*) = \max_y \{\phi(y) \triangleq \min_{x \in Q} \{f(x) + \langle y, b - Ax \rangle\}\}$ . Clearly, the dual  
26 objective  $-\phi(y)$  is smooth convex. Letting  $x_y$  be the unique solution to the inner problem, we have  
27  $\nabla \phi(y) = b - Ax_y$ . Note that  $f(x_y) - f(x^*) = \phi(y) - \langle y, \nabla \phi(y) \rangle - \phi(y^*) \leq \|y\| \|\nabla \phi(y)\|$ .  
28 Thus, in this problem, the quantity  $\|\nabla \phi(y)\|$  serves as a measure of both primal optimality  
29  $f(x_y) - f(x^*)$  and feasibility  $\|b - Ax_y\|$ , which is better than just measuring the function value.
- 30 • Matrix scaling [50] is a convex problem and its goal is to find near-stationary points [4, 9].
- 31 • Gradient norm is readily available, unlike other optimality measures ( $f(x) - f(x^*)$  and  $\|x - x^*\|$ ),  
32 and is thus usable as a stopping criterion. This fact motivates the design of several parameter-free  
33 algorithms [43, 39, 27], and their guarantees are established on the gradient norm.
- 34 • Designing schemes for minimizing the gradient norm can inspire new non-convex optimization  
35 methods. For example, SARAH [46] was designed for convex finite-sums with gradient-norm mea-  
36 sure, but was later discovered to be the near-optimal method for non-convex finite-sums [21, 47].

Table 1: Finding near-stationary points  $\|\nabla f(x)\| \leq \epsilon$  of convex finite-sums.

|             | Algorithm                   | Complexity                                                                           | Remark                                                                                                       |
|-------------|-----------------------------|--------------------------------------------------------------------------------------|--------------------------------------------------------------------------------------------------------------|
| I<br>F<br>C | GD [33]                     | $O(\frac{n}{\epsilon^2})$                                                            |                                                                                                              |
|             | Regularized NAG* [7]        | $O(\frac{n}{\epsilon} \log \frac{1}{\epsilon})$                                      |                                                                                                              |
|             | OGM-G [33]                  | $O(\frac{n}{\epsilon})$                                                              | $O(\frac{1}{\epsilon} + d)$ memory, optimal in $\epsilon$                                                    |
|             | M-OGM-G [Section 3.1]       | $O(\frac{n}{\epsilon})$                                                              | $O(d)$ memory, optimal in $\epsilon$                                                                         |
|             | L2S [37]                    | $O(n + \frac{\sqrt{n}}{\epsilon^2})$                                                 | Loopless variant of SARAH [46]                                                                               |
|             | Regularized Katyusha* [2]   | $O((n + \frac{\sqrt{n}}{\epsilon}) \log \frac{1}{\epsilon})$                         | Requires the knowledge of $\Delta_0$                                                                         |
|             | R-Acc-SVRG-G* [Section 5]   | $O((n \log \frac{1}{\epsilon} + \frac{\sqrt{n}}{\epsilon}) \log \frac{1}{\epsilon})$ | Without the knowledge of $\Delta_0$                                                                          |
| I<br>D<br>C | GD [42, 54]                 | $O(\frac{n}{\epsilon})$                                                              |                                                                                                              |
|             | NAG / NAG + GD [32] / [42]  | $O(\frac{n}{\epsilon^{2/3}})$                                                        |                                                                                                              |
|             | Regularized NAG* [42, 27]   | $O(\frac{n}{\sqrt{\epsilon}} \log \frac{1}{\epsilon})$                               |                                                                                                              |
|             | NAG + OGM-G [45]            | $O(\frac{n}{\sqrt{\epsilon}})$                                                       | $O(\frac{1}{\sqrt{\epsilon}} + d)$ memory, optimal in $\epsilon$                                             |
|             | NAG + M-OGM-G [Section 3.1] | $O(\frac{n}{\sqrt{\epsilon}})$                                                       | $O(d)$ memory, optimal in $\epsilon$                                                                         |
|             | Katyusha + L2S [Appendix E] | $O(n \log \frac{1}{\epsilon} + \frac{\sqrt{n}}{\epsilon^{2/3}})$                     |                                                                                                              |
|             | Acc-SVRG-G [Section 4]      | $O(n \log \frac{1}{\epsilon} + \frac{n^{2/3}}{\epsilon^{2/3}})^1$                    | $O(n \log \frac{1}{\epsilon} + \sqrt{\frac{n}{\epsilon}})$ for function at the same time, simple and elegant |
|             | Regularized Katyusha* [2]   | $O((n + \sqrt{\frac{n}{\epsilon}}) \log \frac{1}{\epsilon})$                         | Requires the knowledge of $R_0$                                                                              |
|             | R-Acc-SVRG-G* [Section 5]   | $O((n \log \frac{1}{\epsilon} + \sqrt{\frac{n}{\epsilon}}) \log \frac{1}{\epsilon})$ | Without the knowledge of $R_0$                                                                               |

\* Indirect methods (using regularization).

Moreover, finding near-stationary points is a harder task than minimizing function value, because NAG has the optimal guarantee for  $f(x) - f(x^*)$  but is only suboptimal for minimizing  $\|\nabla f(x)\|$ . In this work, we consider the problem  $\min_{x \in \mathbb{R}^d} f(x) = \frac{1}{n} \sum_{i=1}^n f_i(x)$ , where each  $f_i$  is  $L$ -smooth and convex. We focus on finding an  $\epsilon$ -stationary point of this objective, i.e., a point with  $\|\nabla f(x)\| \leq \epsilon$ . We use  $\mathcal{X}^*$  to denote the set of optimal solutions, which is assumed to be nonempty. There are two different assumptions on the initial point  $x_0$ , namely, the Initial bounded-Function Condition (IFC):  $f(x_0) - f(x^*) \leq \Delta_0$ , and the Initial bounded-Distance Condition (IDC):  $\|x_0 - x^*\| \leq R_0$  for some  $x^* \in \mathcal{X}^*$ . This subtlety results in drastically different best achievable rates as studied in [7, 22]. Below we categorize existing algorithmic techniques into three classes (relating to Table 1).

- (i) “IDC + IFC”. Nesterov [42] showed that we can combine the guarantees of a method minimizing function value under IDC and a method finding near-stationary points under IFC to produce a faster one for minimizing gradient norm under IDC. For example, NAG produces  $f(x_{K_1}) - f(x^*) = O(\frac{LR_0^2}{K_1^2})$  [40] and GD produces  $\|\nabla f(x_{K_2})\|^2 = O(\frac{L(f(x_0) - f(x^*))}{K_2})$  [33] under IFC. Letting  $x_0 = x_{K_1}$  and  $K = K_1 + K_2$ , by balancing the ratio of  $K_1$  and  $K_2$ , we obtain the guarantee  $\|\nabla f(x_K)\|^2 = O(\frac{L^2 R_0^2}{K^3})$  for “NAG + GD”. We point out that we can use this technique to combine the guarantees of Katyusha [1] and SARAH<sup>2</sup> [46]; see Appendix E.
- (ii) *Regularization*. Nesterov [42] used NAG (strongly convex variant) to solve the regularized objective, and showed that it achieves near-optimal complexity (optimal up to logarithmic factors). Inspired by this technique, Allen-Zhu [2] proposed recursive regularization for stochastic approximation algorithms, which also achieves near-optimal complexities [22].

<sup>1</sup>Table 1 shows that Katyusha+L2S has a slightly better dependence on  $n$  than Acc-SVRG-G. It is due to the adoption of  $n$ -dependent step size in L2S. As studied in [37], despite having a better complexity,  $n$ -dependent step size boosts numerical performance only when  $n$  is *extremely large*. If the practically fast  $n$ -independent step size is used for L2S, Katyusha+L2S and Acc-SVRG-G have the same complexity. See also Appendix A.

<sup>2</sup>We adopt the loopless variant of SARAH in [37], which has a refined analysis for general convex objectives.

(iii) *Direct methods.* Due to the lack of insight, existing direct methods are mostly derived or analyzed with the help of computer-aided tools [31, 32, 54, 33]. The computer-aided approach was pioneered by Drori and Teboulle [19], who introduced the performance estimation problem (PEP). The only known optimal method OGM-G [33] was designed based on the PEP approach.

Observe that since  $f(x) - f(x^*) \leq \|\nabla f(x)\| \|x - x^*\|$ , the lower bound for finding near-stationary points must be of the same order as for minimizing function value [44]. Thus, under IDC, the lower bound is  $\Omega(n + \sqrt{\frac{n}{\epsilon}})$  due to [58]. Under IFC, we can establish an  $\Omega(n + \frac{\sqrt{n}}{\epsilon})$  lower bound using the techniques in [7, 58]. The main contributions of this work are three new algorithmic schemes that improve the practicalities of existing methods as summarized below (highlighted in Table 1).

- (Section 3) We propose a memory-saving variant of OGM-G for the deterministic case ( $n = 1$ ), which does not require a pre-computed and stored parameter sequence. The derivation of the new variant is inspired by the numerical solution to a PEP problem.
- (Section 4) We propose a new accelerated SVRG [29, 59] variant that can *simultaneously* achieve fast convergence rates for minimizing both the gradient norm and function value, that is,  $O(n \log \frac{1}{\epsilon} + \frac{n^{2/3}}{\epsilon^{2/3}})$  complexity for gradient norm and  $O(n \log \frac{1}{\epsilon} + \sqrt{\frac{n}{\epsilon}})$  complexity for function value. Note that other stochastic approaches in Table 1 do not have this property.
- (Section 5) We propose an adaptively regularized accelerated SVRG variant, which does not require the knowledge of  $R_0$  or  $\Delta_0$  and achieves a near-optimal complexity under IDC or IFC.

We put in extra efforts to make the proposed schemes as simple and elegant as possible. We believe that the simplicity makes the extensions of the new schemes easier.

## 2 Preliminaries

Throughout this paper, we use  $\langle \cdot, \cdot \rangle$  and  $\|\cdot\|$  to denote the inner product and the Euclidean norm, respectively. We let  $[n]$  denote the set  $\{1, 2, \dots, n\}$ ,  $\mathbb{E}$  denote the total expectation and  $\mathbb{E}_{i_k}$  denote the expectation with respect to a random sample  $i_k$ . We say that a function  $f : \mathbb{R}^d \rightarrow \mathbb{R}$  is *L-smooth* if it has *L*-Lipschitz continuous gradients, i.e.,

$$\forall x, y \in \mathbb{R}^d, \|\nabla f(x) - \nabla f(y)\| \leq L \|x - y\|.$$

A continuously differentiable  $f$  is called  $\mu$ -strongly convex if

$$\forall x, y \in \mathbb{R}^d, f(x) - f(y) - \langle \nabla f(y), x - y \rangle \geq \frac{\mu}{2} \|x - y\|^2.$$

Other equivalent definitions of these two assumptions can be found in the textbook [44]. The following is an important consequence of a function  $f$  being *L-smooth* and convex:

$$\forall x, y \in \mathbb{R}^d, f(x) - f(y) - \langle \nabla f(y), x - y \rangle \geq \frac{1}{2L} \|\nabla f(x) - \nabla f(y)\|^2. \quad (1)$$

We call (1) the *interpolation condition* at  $(x, y)$  following [56]. If  $f$  is both *L-smooth* and  $\mu$ -strongly convex, we can define a “shifted” function  $h(x) = f(x) - f(x^*) - \frac{\mu}{2} \|x - x^*\|^2$  following [63]. It can be easily verified that  $h$  is  $(L - \mu)$ -smooth and convex, and thus from (1),

$$\forall x, y \in \mathbb{R}^d, h(x) - h(y) - \langle \nabla h(y), x - y \rangle \geq \frac{1}{2(L - \mu)} \|\nabla h(x) - \nabla h(y)\|^2, \quad (2)$$

which is equivalent to the *strongly convex interpolation condition* discovered in [56].

Oracle complexity (or simply complexity) refers to the required number of stochastic gradient  $\nabla f_i$  computations to find an  $\epsilon$ -accurate solution.

## 3 OGM-G: “Momentum” Reformulation and a Memory-Saving Variant

In this section, we focus on the IFC case, i.e.,  $f(x_0) - f(x^*) \leq \Delta_0$ . We use  $N$  to denote the total iteration number to prevent confusion (in other sections, we use  $K$ ). Proofs in this section are given in

---

**Algorithm 1** OGM-G: “Momentum” reformulation

---

**Input:** initial guess  $x_0 \in \mathbb{R}^d$ , total iteration number  $N$ .

**Initialize:** vector  $v_0 = \mathbf{0}$ , scalars  $\theta_N = 1$  and  $\theta_k^2 - \theta_k = \theta_{k+1}^2$ , for  $k = 0 \dots N - 1$ .

1: **for**  $k = 0, \dots, N - 1$  **do**

2:  $v_{k+1} = v_k + \frac{1}{L\theta_k\theta_{k+1}^2} \nabla f(x_k)$ .

3:  $x_{k+1} = x_k - \frac{1}{L} \nabla f(x_k) - (2\theta_{k+1}^3 - \theta_{k+1}^2)v_{k+1}$ .

4: **end for**

**Output:**  $x_N$ .

---

95 Appendix B. Recall that OGM-G has the following updates [33]. Let  $y_0 = x_0$ . For  $k = 0, \dots, N - 1$ ,

$$\begin{aligned} y_{k+1} &= x_k - \frac{1}{L} \nabla f(x_k), \\ x_{k+1} &= y_{k+1} + \frac{(\theta_k - 1)(2\theta_{k+1} - 1)}{\theta_k(2\theta_k - 1)}(y_{k+1} - y_k) + \frac{2\theta_{k+1} - 1}{2\theta_k - 1}(y_{k+1} - x_k), \end{aligned} \quad (3)$$

97 where  $\{\theta_k\}$  is recursively defined:  $\theta_N = 1$  and  $\begin{cases} \theta_k^2 - \theta_k = \theta_{k+1}^2 & k = 1 \dots N - 1, \\ \theta_0^2 - \theta_0 = 2\theta_1^2 & \text{otherwise.} \end{cases}$

98 OGM-G was discovered from the numerical solution to an SDP problem and its analysis is to show  
99 that the step coefficients in (3) specify a feasible solution to the SDP problem. While this analysis is  
100 natural for the PEP approach, it is hard to understand how each coefficient affects the rate, especially  
101 if one wants to generalize the scheme. Here we provide a simple algebraic analysis for OGM-G.

102 We start with a reformulation<sup>3</sup> of OGM-G in Algorithm 1, which aims to simplify the proof. We  
103 adopt a consistent  $\{\theta_k\}$ :  $\theta_N = 1$  and  $\theta_k^2 - \theta_k = \theta_{k+1}^2$ ,  $k = 0 \dots N - 1$ , which only costs a constant  
104 factor.<sup>4</sup> Interestingly, the reformulated scheme resembles the heavy-ball momentum method [49].  
105 However, it can be shown that Algorithm 1 is not covered by the heavy-ball momentum scheme.  
106 Defining  $\theta_{N+1}^2 = \theta_N^2 - \theta_N = 0$ , we provide the one-iteration analysis in the following proposition:

107 **Proposition 3.1.** *In Algorithm 1, the following holds at any iteration  $k \in \{0, \dots, N - 1\}$ :*

$$\begin{aligned} A_k + B_{k+1} + C_{k+1} + E_{k+1} &\leq A_{k+1} + B_k + C_k + E_k - \theta_{k+1} \langle \nabla f(x_{k+1}), v_{k+1} \rangle \\ &\quad + \sum_{i=k+1}^N \frac{\theta_i}{L\theta_k\theta_{k+1}^2} \langle \nabla f(x_k), \nabla f(x_i) \rangle, \end{aligned} \quad (4)$$

108 with  $A_k \triangleq \frac{1}{\theta_k^2} (f(x_N) - f(x^*) - \frac{1}{2L} \|\nabla f(x_N)\|^2)$ ,  $B_k \triangleq \frac{1}{\theta_k^2} (f(x_k) - f(x^*))$ ,  $C_k \triangleq \frac{1}{2L\theta_k^2} \|\nabla f(x_k)\|^2$ ,

109  $E_k \triangleq \frac{\theta_{k+1}^2}{\theta_k} \langle \nabla f(x_k), v_k \rangle$ .

110 **Remark 3.1.1.** *A recent work [15] also conducted an algebraic analysis of OGM-G under a potential  
111 function framework. Their potential function decrease can be directly obtained from Proposition 3.1  
112 by summing up (4). By contrast, our “momentum” vector  $\{v_k\}$  naturally merges into the analysis,  
113 which significantly simplifies the analysis. Moreover, it provides a better interpretation on how  
114 OGM-G utilizes the past gradients to achieve acceleration.*

115 From (4), we see that only the last two terms do not telescope. Note that the “momentum” vector is a  
116 weighted sum of the past gradients, i.e.,  $v_{k+1} = \sum_{i=0}^k \frac{1}{L\theta_i\theta_{i+1}^2} \nabla f(x_i)$ . If we sum the terms up from  
117  $k = 0, \dots, N - 1$ , it can be verified that they exactly sum up to 0. The presence of these special  
118 terms prevents OGM-G to have a usual potential function (e.g., those in [6]). Then, by telescoping  
119 the remaining terms, we obtain the final convergence guarantee.

120 **Theorem 3.1.** *The output of Algorithm 1 satisfies  $\|\nabla f(x_N)\|^2 \leq \frac{8L\Delta_0}{(N+2)^2}$ .*

121 We observe two drawbacks of OGM-G (same as the algorithm description in [15]): (1) it requires  
122 storing a pre-computed parameter sequence, which costs  $O(\frac{1}{\epsilon})$  floats; (2) except for the last iterate,

---

<sup>3</sup>It can be verified that this scheme is equivalent to the original one (3) through  $v_k = \frac{1}{(2\theta_k - 1)\theta_k^2} (y_k - x_k)$ .

<sup>4</sup>The original guarantee of OGM-G can be recovered if we set  $\theta_0^2 - \theta_0 = 2\theta_1^2$ .

---

**Algorithm 2** M-OGM-G: Memory-saving OGM-G

---

**Input:** initial guess  $x_0 \in \mathbb{R}^d$ , total iteration number  $N$ .

**Initialize:** vector  $v_0 = \mathbf{0}$ .

1: **for**  $k = 0, \dots, N - 1$  **do**

2:  $v_{k+1} = v_k + \frac{12}{L(N-k+1)(N-k+2)(N-k+3)} \nabla f(x_k)$ .

3:  $x_{k+1} = x_k - \frac{1}{L} \nabla f(x_k) - \frac{(N-k)(N-k+1)(N-k+2)}{6} v_{k+1}$ .

4: **end for**

**Output:**  $x_N$  or  $\arg \min_{x \in \{x_0, \dots, x_N\}} \|\nabla f(x)\|$ .

---

all other iterates are not known to have guarantees. We resolve these issues by proposing another parameterization of Algorithm 1 in the next subsection.

### 3.1 Memory-Saving OGM-G

A straightforward idea to resolve the aforementioned issues is to generalize Algorithm 1. However, we find it rather difficult since the parameters in the analysis are rather strict (despite that the proof is already simple). We choose to rely on computer-aided techniques [19]. The derivation of this variant (Algorithm 2) is based on the following numerical experiment.

**Numerical experiment.** OGM-G was discovered when considering the relaxed PEP problem [33]:

$$\begin{aligned} & \max_{\substack{\nabla f(x_0), \dots, \nabla f(x_N) \in \mathbb{R}^d \\ f(x_0), \dots, f(x_N), f(x^*) \in \mathbb{R}}} \|\nabla f(x_N)\|^2 \\ & \text{subject to } \begin{cases} \text{interpolation condition (1) at } (x_k, x_{k+1}), & k = 0, \dots, N-1, \\ \text{interpolation condition (1) at } (x_N, x_k), & k = 0, \dots, N-1, \\ \text{interpolation condition (1) at } (x_N, x^*), & f(x_0) - f(x^*) \leq \Delta_0, \end{cases} \end{aligned} \quad (\text{P})$$

where the sequence  $\{x_k\}$  is defined as  $x_{k+1} = x_k - \frac{1}{L} \sum_{i=0}^k h_{k+1,i} \nabla f(x_i)$ ,  $k = 0, \dots, N-1$  for some step coefficients  $h \in \mathbb{R}^{N(N+1)/2}$ . Given  $N$ , the step coefficients of OGM-G correspond to a numerical solution to the problem:  $\arg \min_h \{\text{Lagrangian dual of (P)}\}$ , which is denoted as (HD). Conceptually, solving problem (HD) would give us the fastest possible step coefficients under the constraints.<sup>5</sup> We expect there to be some constant-time slower schemes, which are neglected when solving (HD). To identify such schemes, we relax a set of interpolation conditions in problem (P):

$$f(x_N) - f(x_k) - \langle \nabla f(x_k), x_N - x_k \rangle \geq \frac{1}{2L} \|\nabla f(x_N) - \nabla f(x_k)\|^2 - \rho \|\nabla f(x_k)\|^2,$$

for  $k = 0, \dots, N-1$  and some  $\rho > 0$ . After this relaxation, solving (HD) will no longer give us the step coefficients of OGM-G. By trying different  $\rho$  and checking the dependence on  $N$ , we discover Algorithm 2 when  $\rho = \frac{1}{2L}$ . Similar to our analysis of OGM-G, we provide a simple algebraic analysis for the new variant in the following theorem.

**Theorem 3.2.** Define  $\delta_{k+1} \triangleq \frac{12}{(N-k+1)(N-k+2)(N-k+3)}$ ,  $k = 0, \dots, N$ . In Algorithm 2, it holds that

$$\sum_{k=0}^N \frac{\delta_{k+1}}{2} \|\nabla f(x_k)\|^2 \leq \frac{12L\Delta_0}{(N+2)(N+3)}. \quad (5)$$

**Remark 3.2.1.** Algorithm 2 converges optimally on the last iterate (note that  $\delta_{N+1} = 2$ ) and the minimum gradient since

$$\min_{k \in \{0, \dots, N\}} \|\nabla f(x_k)\|^2 \leq \frac{1}{\sum_{k=0}^N \frac{\delta_{k+1}}{2}} \sum_{k=0}^N \frac{\delta_{k+1}}{2} \|\nabla f(x_k)\|^2 \leq \frac{8L\Delta_0}{(N+2)(N+3) - 2}.$$

Clearly, the parameters of this variant can be computed on the fly and from (5), each iterate has a guarantee (although the guarantee degenerates quickly as  $k \rightarrow 0$  since  $1/\delta_{k+1} = \Omega((N-k)^3)$ ). Moreover, we can extend the benefits into the IDC case using the ideas in [42] as summarized below.

<sup>5</sup>However, since problem (HD) is non-convex, we can only obtain approximate solutions.

---

**Algorithm 3** Acc-SVRG-G: Accelerated SVRG for Gradient minimization

---

**Input:** parameters  $\{\tau_k\}$ ,  $\{p_k\}$ , initial guess  $x_0 \in \mathbb{R}^d$ , total iteration number  $K$ .

**Initialize:** vectors  $z_0 = \tilde{x}_0 = x_0$  and scalars  $\alpha_k = \frac{L\tau_k}{1-\tau_k}, \forall k$  and  $\tilde{\tau} = \sum_{k=0}^{K-1} \tau_k^{-2}$ .

1: **for**  $k = 0, \dots, K-1$  **do**

2:  $y_k = \tau_k z_k + (1 - \tau_k) \left( \tilde{x}_k - \frac{1}{L} \nabla f(\tilde{x}_k) \right).$

3:  $z_{k+1} = \arg \min_x \left\{ \langle \mathcal{G}_k, x \rangle + (\alpha_k/2) \|x - z_k\|^2 \right\}.$

4:  $\mathcal{G}_k \triangleq \nabla f_{i_k}(y_k) - \nabla f_{i_k}(\tilde{x}_k) + \nabla f(\tilde{x}_k)$ , where  $i_k$  is sampled uniformly in  $[n]$ .

5:  $\tilde{x}_{k+1} = \begin{cases} y_k & \text{with probability } p_k, \\ \tilde{x}_k & \text{with probability } 1 - p_k. \end{cases}$

6: **end for**

**Output (for gradient):**  $x_{\text{out}}$  is sampled from  $\left\{ \text{Prob}\{x_{\text{out}} = \tilde{x}_k\} = \frac{\tau_k^{-2}}{\tilde{\tau}} \mid k \in \{0, \dots, K-1\} \right\}.$

**Output (for function value):**  $\tilde{x}_K$ .

---

148 **Corollary 3.2.1** (IDC case). *If we first run  $N/2$  iterations of NAG and then continue with  $N/2$*   
 149 *iterations of Algorithm 2, we obtain an output satisfying  $\|\nabla f(x_N)\| = O(\frac{LR_0}{N^2})$ .*

## 150 4 Accelerated SVRG: Fast Rates for Both Gradient Norm and Objective

151 In this section, we focus on the IDC case, i.e.,  $\|x_0 - x^*\| \leq R_0$  for some  $x^* \in \mathcal{X}^*$ . From the  
 152 development in the previous section, it is natural to ask whether we can use the PEP approach to  
 153 motivate new stochastic schemes. However, due to the exponential growth of the number of possible  
 154 states  $(i_0, i_1, \dots)$ , we cannot directly adopt this approach. A feasible alternative is to first fix an  
 155 algorithmic framework and a family of potential functions, and then use the potential-based PEP  
 156 approach in [54]. However, this approach is much more restrictive. For example, it cannot identify  
 157 special constructions like (4) in OGM-G. Fortunately, as we will see, we can get some inspiration  
 158 from the recent development of deterministic methods. Proofs in this section are given in Appendix C.

159 Our proposed scheme is given in Algorithm 3. We adopt the elegant loopless design of SVRG in  
 160 [34]. Note that the full gradient  $\nabla f(\tilde{x}_k)$  is computed and stored only when  $\tilde{x}_{k+1} = y_k$  at Step 5. We  
 161 summarize our main technical novelty as follows.

162 **Main algorithmic novelty.** The design of stochastic accelerated methods is largely inspired by  
 163 NAG. To make it clear, by setting  $n = 1$ , we see that Katyusha [1], MiG [61], SSNM [62], Varag [36],  
 164 VRADA [52], ANITA [38], the acceleration framework in [16] and AC-SA [35, 24] all reduce to one  
 165 of the following variants of NAG. We say that these methods are under the NAG framework.

$$\begin{array}{ll} \begin{cases} x_k = \tau_k z_k + (1 - \tau_k) y_k, \\ z_{k+1} = z_k - \alpha_k \nabla f(x_k), \\ y_{k+1} = \tau_k z_{k+1} + (1 - \tau_k) y_k. \end{cases} & \begin{cases} x_k = \tau_k z_k + (1 - \tau_k) y_k, \\ z_{k+1} = z_k - \alpha_k \nabla f(x_k), \\ y_{k+1} = x_k - \eta_k \nabla f(x_k). \end{cases} \\ \text{Auslender and Teboulle [5]} & \text{Linear Coupling [64]} \end{array}$$

166 See [57, 12] for other variants of NAG. When  $n = 1$ , Algorithm 3 reduces to the following scheme:

$$\begin{cases} y_k = \tau_k z_k + (1 - \tau_k) \left( y_{k-1} - \frac{1}{L} \nabla f(y_{k-1}) \right), \\ z_{k+1} = z_k - \frac{1}{\alpha_k} \nabla f(y_k). \end{cases}$$

Optimized Gradient Method (OGM) [19, 30]

167 Algorithm 3 reduces to the scheme of OGM when  $n = 1$  (this point is clearer in the formulation of  
 168 ITEM in [55]). OGM has a constant-time faster worst-case rate than NAG, which exactly matches  
 169 the lower complexity bound established in [17]. In the following proposition, we show that the OGM  
 170 framework helps us conduct a tight one-iteration analysis, which gives room for achieving our goal.

171 **Proposition 4.1.** *In Algorithm 3, the following holds at any iteration  $k \geq 0$  and  $\forall x^* \in \mathcal{X}^*$  :*

$$\begin{aligned} & \left( \frac{1 - \tau_k}{\tau_k^2 p_k} \mathbb{E} [f(\tilde{x}_{k+1}) - f(x^*)] + \frac{L}{2} \mathbb{E} [\|z_{k+1} - x^*\|^2] \right) + \frac{(1 - \tau_k)^2}{2L\tau_k^2} \mathbb{E} [\|\nabla f(\tilde{x}_k)\|^2] \\ & \leq \left( \frac{(1 - \tau_k p_k)(1 - \tau_k)}{\tau_k^2 p_k} \mathbb{E} [f(\tilde{x}_k) - f(x^*)] + \frac{L}{2} \mathbb{E} [\|z_k - x^*\|^2] \right). \end{aligned} \quad (6)$$

172 The terms inside the parentheses form the commonly used potential function of SVRG variants. The  
173 additional  $\mathbb{E}[\|\nabla f(\tilde{x}_k)\|^2]$  term is created by adopting the OGM framework. In other words, we use  
174 the following potential function for Algorithm 3 ( $a_k, b_k, c_k \geq 0$ ):

$$T_k = a_k \mathbb{E} [f(\tilde{x}_k) - f(x^*)] + b_k \mathbb{E} [\|z_k - x^*\|^2] + \sum_{i=0}^{k-1} c_i \mathbb{E} [\|\nabla f(\tilde{x}_i)\|^2].$$

175 We first provide a simple parameter choice, which leads to a simple and clean analysis.

176 **Theorem 4.1** (Single-stage parameter choice). *In Algorithm 3, if we choose  $p_k \equiv \frac{1}{n}$ ,  $\tau_k = \frac{3}{k/n+6}$ ,  
177 then the following holds at the outputs:*

$$\begin{aligned} \mathbb{E} [\|\nabla f(x_{\text{out}})\|^2] &= O \left( \frac{n^3 L (f(x_0) - f(x^*)) + n^2 L^2 R_0^2}{K^3} \right), \\ \mathbb{E} [f(\tilde{x}_K)] - f(x^*) &= O \left( \frac{n^2 (f(x_0) - f(x^*)) + n L R_0^2}{K^2} \right). \end{aligned} \quad (7)$$

178 In other words, to guarantee that  $\mathbb{E} [\|\nabla f(x_{\text{out}})\|] \leq \epsilon_g$  and  $\mathbb{E} [f(\tilde{x}_K)] - f(x^*) \leq \epsilon_f$ , the oracle com-  
179 plexities are  $O \left( \frac{n(L(f(x_0) - f(x^*)))^{1/3}}{\epsilon_g^{2/3}} + \frac{(n L R_0^2)^{2/3}}{\epsilon_g^{2/3}} \right)$  and  $O \left( n \sqrt{\frac{f(x_0) - f(x^*)}{\epsilon_f}} + \frac{\sqrt{n L R_0}}{\sqrt{\epsilon_f}} \right)$ , respectively.

180 From (7), we see that Algorithm 3 achieves fast  $O(\frac{1}{K^{1.5}})$  and  $O(\frac{1}{K^2})$  rates for minimizing the  
181 gradient norm and function value at the same time. However, despite being a simple choice, the oracle  
182 complexities are not better than the deterministic methods in Table 1. Below we provide a two-stage  
183 parameter choice, which is inspired by the idea of including a “warm-up phase” in [3, 36, 52, 38].  
184 This theorem corresponds to the reported result in Table 1.

185 **Theorem 4.2** (Two-stage parameter choice). *In Algorithm 3, let  $p_k = \max\{\frac{6}{k+8}, \frac{1}{n}\}$ ,  $\tau_k = \frac{3}{p_k(k+8)}$ .  
186 The oracle complexities needed to guarantee  $\mathbb{E} [\|\nabla f(x_{\text{out}})\|] \leq \epsilon_g$  and  $\mathbb{E} [f(\tilde{x}_K)] - f(x^*) \leq \epsilon_f$  are*

$$O \left( n \min \left\{ \log \frac{L R_0}{\epsilon_g}, \log n \right\} + \frac{(n L R_0^2)^{2/3}}{\epsilon_g^{2/3}} \right) \text{ and } O \left( n \min \left\{ \log \frac{L R_0^2}{\epsilon_f}, \log n \right\} + \frac{\sqrt{n L R_0}}{\sqrt{\epsilon_f}} \right),$$

187 respectively.

188 If  $\epsilon$  is large or  $n$  is very large, the recently proposed ANITA [38] achieves an  $O(n)$  complexity, which  
189 matches the lower complexity bound  $\Omega(n)$  in this case [58]. Since ANITA uses the NAG framework,  
190 we show that similar results can be derived under the OGM framework in the following theorem:

191 **Theorem 4.3** (Low accuracy parameter choice). *In Algorithm 3, let iteration  $N$  be the first time  
192 Step 5 updates  $\tilde{x}_{k+1} = y_k$ . If we choose  $p_k \equiv \frac{1}{n}$ ,  $\tau_k \equiv 1 - \frac{1}{\sqrt{n+1}}$  and terminate Algorithm 3 at  
193 iteration  $N$ , then the following holds at  $\tilde{x}_{N+1}$  :*

$$\mathbb{E} [\|\nabla f(\tilde{x}_{N+1})\|^2] \leq \frac{8L^2 R_0^2}{5(\sqrt{n+1}+1)} \text{ and } \mathbb{E} [f(\tilde{x}_{N+1})] - f(x^*) \leq \frac{L R_0^2}{\sqrt{n+1}+1}.$$

194 In particular, if the required accuracies are low (or  $n$  is very large), i.e.,  $\epsilon_g^2 \geq \frac{8L^2 R_0^2}{5(\sqrt{n+1}+1)}$  and  
195  $\epsilon_f \geq \frac{L R_0^2}{\sqrt{n+1}+1}$ , then Algorithm 3 only has an  $O(n)$  oracle complexity.

196 In the low accuracy region (specified above), the choice in Theorem 4.3 removes the  $O(\log \frac{1}{\epsilon})$  factor  
197 in the complexity of Theorem 4.2. We include some numerical justifications of Algorithm 3 in  
198 Appendix A. We believe that the potential-based PEP approach in [54] can help us identify better  
199 parameter choices of Algorithm 3, which we leave for future work.

---

**Algorithm 4** R-Acc-SVRG-G
 

---

**Input:** accuracy  $\epsilon > 0$ , parameters  $\delta_0 = L, \beta > 1$ , initial guess  $x_0 \in \mathbb{R}^d$ .

- 1: **for**  $t = 0, 1, 2, \dots$  **do**
- 2:   Define  $f^{\delta_t}(x) = (1/n) \sum_{i=1}^n f_i^{\delta_t}(x)$ , where  $f_i^{\delta_t}(x) = f_i(x) + (\delta_t/2) \|x - x_0\|^2$ .
- 3:   Initialize vectors  $z_0 = \tilde{x}_0 = x_0$  and set  $\tau_x, \tau_z, \alpha, p, C_{\text{IDC}}, C_{\text{IFC}}$  according to Proposition 5.1.
- 4:   **for**  $k = 0, 1, 2, \dots$  **do**
- 5:      $y_k = \tau_x z_k + (1 - \tau_x) \tilde{x}_k + \tau_z (\delta_t(\tilde{x}_k - z_k) - \nabla f^{\delta_t}(\tilde{x}_k))$ .
- 6:      $z_{k+1} = \arg \min_x \left\{ \left\langle \mathcal{G}_k^{\delta_t}, x \right\rangle + (\alpha/2) \|x - z_k\|^2 + (\delta_t/2) \|x - y_k\|^2 \right\}$ .
- 7:      $\mathcal{G}_k^{\delta_t} \triangleq \nabla f_{i_k}^{\delta_t}(y_k) - \nabla f_{i_k}^{\delta_t}(\tilde{x}_k) + \nabla f^{\delta_t}(\tilde{x}_k)$ , where  $i_k$  is sampled uniformly in  $[n]$ .
- 8:      $\tilde{x}_{k+1} = \begin{cases} y_k & \text{with probability } p, \\ \tilde{x}_k & \text{with probability } 1 - p. \end{cases}$
- 9:     **if**  $\|\nabla f(\tilde{x}_k)\| \leq \epsilon$  **then** output  $\tilde{x}_k$  and terminate the algorithm.
- 10:    **if** under IDC and  $(1 + \frac{\delta_t}{\alpha})^k \geq \sqrt{C_{\text{IDC}}}/\delta_t$  **then** break the inner loop.
- 11:    **if** under IFC and  $(1 + \frac{\delta_t}{\alpha})^k \geq \sqrt{C_{\text{IFC}}}/2\delta_t$  **then** break the inner loop.
- 12:   **end for**
- 13:    $\delta_{t+1} = \delta_t/\beta$ .
- 14: **end for**

---

## 5 Near-Optimal Accelerated SVRG with Adaptive Regularization

Currently, there is no known stochastic method that directly achieves the optimal rate in  $\epsilon$ . To get near-optimal rates, the existing strategy is to use a carefully designed regularization technique [42, 2] with a method that solves strongly convex problems; see, e.g., [42, 2, 22, 11]. However, the regularization parameter requires the knowledge of  $R_0$  or  $\Delta_0$ , which significantly limits its practicality.

Inspired by the recently proposed adaptive regularization technique [27], we develop a near-optimal accelerated SVRG variant (Algorithm 4) that does not require the knowledge of  $R_0$  or  $\Delta_0$ . Note that this technique was originally proposed for NAG under the IDC assumption. Our development extends this technique to the stochastic setting, which brings an  $O(\sqrt{n})$  rate improvement. Moreover, we consider both IFC and IDC cases. Proofs in this section are provided in Appendix D.

**Detailed design.** Algorithm 4 has a “guess-and-check” framework. In the outer loop, we first define the regularized objective  $f^{\delta_t}$  using the current estimate of regularization parameter  $\delta_t$ , and then we initialize an accelerated SVRG method (the inner loop) to solve the  $\delta_t$ -strongly convex  $f^{\delta_t}$ . If the inner loop breaks at Step 10 or 11, indicating the poor quality of the current estimate  $\delta_t$ ,  $\delta_t$  will be divided by a fixed  $\beta$ . Thus, conceptually, we can adopt any method that solves strongly convex finite-sums at the optimal rate as the inner loop. However, since the constructions of Step 10 or 11 require some algorithm-dependent constants, we have to fix one method as the inner loop.

The inner loop we adopted is a loopless variant of BS-SVRG [63]. This is because (i) BS-SVRG is the fastest known accelerated SVRG variant (for ill-conditioned problems) and (ii) it has a simple scheme, especially after using the loopless construction [34]. However, its original guarantee is built upon  $\{z_k\}$ . Clearly, we cannot implement the stopping criterion (Step 9) on  $\|\nabla f(z_k)\|$ . Interestingly, we discover that its sequence  $\{\tilde{x}_k\}$  works perfectly in our regularization framework, even if we can neither establish convergence on  $f(\tilde{x}_k) - f(x^*)$  nor on  $\|\tilde{x}_k - x^*\|^2$ .<sup>7</sup> Moreover, we find that the loopless construction significantly simplifies the parameter constraints of BS-SVRG, which originally involves  $\Theta(n)$ th-order inequality. We provide the detailed parameter choice as follows:

**Proposition 5.1** (Parameter choice). *In Algorithm 4, we set  $\tau_x = \frac{\alpha + \delta_t}{\alpha + L + \delta_t}$ ,  $\tau_z = \frac{\tau_x}{\delta_t} - \frac{\alpha(1 - \tau_x)}{\delta_t L}$  and  $p = \frac{1}{n}$ . We set  $\alpha$  as the (unique) positive root of the cubic equation  $\left(1 - \frac{p(\alpha + \delta_t)}{\alpha + L + \delta_t}\right) \left(1 + \frac{\delta_t}{\alpha}\right)^2 = 1$  and specify  $C_{\text{IDC}} = L^2 + \frac{L\alpha^2 p}{L + (1-p)(\alpha + \delta_t)}$ ,  $C_{\text{IFC}} = 2L + \frac{2L\alpha^2 p}{(L + (1-p)(\alpha + \delta_t))\delta_t}$ . Under these choices, we have  $\frac{\alpha}{\delta_t} = O(n + \sqrt{n(L/\delta_t + 1)})$ ,  $C_{\text{IDC}} = O((L + \delta_t)^2)$ , and  $C_{\text{IFC}} = O(L)$ .*

<sup>6</sup>Note that we maintain the full gradient  $\nabla f^{\delta_t}(\tilde{x}_k)$  and  $\nabla f(\tilde{x}_k) = \nabla f^{\delta_t}(\tilde{x}_k) - \delta_t(\tilde{x}_k - x_0)$ .

<sup>7</sup>It is due to the special potential function of BS-SVRG (see (27)), which does not contain these two terms.

Under the choices of  $\tau_x$  and  $\tau_z$ , the  $\alpha$  above is the optimal choice in our analysis. Then, we can characterize the progress of the inner loop in the following proposition:

**Proposition 5.2** (The inner loop of Algorithm 4). *Using the parameters specified in Proposition 5.1, after running the inner loop (Step 4-12) of Algorithm 4 for  $k$  iterations, we can conclude that*

(i) under IDC, i.e.,  $\|x_0 - x^*\| \leq R_0$  for some  $x^* \in \mathcal{X}^*$ ,

$$\mathbb{E} [\|\nabla f(\tilde{x}_k)\|] \leq \left( \delta_t + \left(1 + \frac{\delta_t}{\alpha}\right)^{-k} \sqrt{C_{\text{IDC}}} \right) R_0,$$

(ii) under IFC, i.e.,  $f(x_0) - f(x^*) \leq \Delta_0$ ,

$$\mathbb{E} [\|\nabla f(\tilde{x}_k)\|] \leq \left( \sqrt{2\delta_t} + \left(1 + \frac{\delta_t}{\alpha}\right)^{-k} \sqrt{C_{\text{IFC}}} \right) \sqrt{\Delta_0}.$$

The above results motivate the design of Step 10 and 11. For example, in the IDC case, when the inner loop breaks at Step 10, using (i) above, we obtain  $\mathbb{E} [\|\nabla f(\tilde{x}_k)\|] \leq 2\delta_t R_0$ . Then, by discussing the relative size of  $\delta_t$  and a certain constant, we can estimate the complexity of Algorithm 4. The same methodology is used for the IFC case.

**Theorem 5.1** (IDC case). *Denote  $\delta_{\text{IDC}}^* = \frac{\epsilon q}{2R_0}$  for some  $q \in (0, 1)$  and let the outer iteration  $t = \ell$  be the first time<sup>8</sup>  $\delta_\ell \leq \delta_{\text{IDC}}^*$ . The following assertions hold:*

- (i) At outer iteration  $\ell$ , Algorithm 4 terminates with probability at least  $1 - q$ .<sup>9</sup>
- (ii) The total expected oracle complexity of the  $\ell + 1$  outer loops is

$$O \left( \left( n \log \frac{LR_0}{\epsilon q} + \sqrt{\frac{nLR_0}{\epsilon q}} \right) \log \frac{LR_0}{\epsilon q} \right).$$

**Theorem 5.2** (IFC case). *Denote  $\delta_{\text{IFC}}^* = \frac{\epsilon^2 q^2}{8\Delta_0}$  for some  $q \in (0, 1)$  and let the outer iteration  $t = \ell$  be the first time  $\delta_\ell \leq \delta_{\text{IFC}}^*$ . The following assertions hold:*

- (i) At outer iteration  $\ell$ , Algorithm 4 terminates with probability at least  $1 - q$ .
- (ii) The total expected oracle complexity of the  $\ell + 1$  outer loops is

$$O \left( \left( n \log \frac{\sqrt{L\Delta_0}}{\epsilon q} + \frac{\sqrt{nL\Delta_0}}{\epsilon q} \right) \log \frac{\sqrt{L\Delta_0}}{\epsilon q} \right).$$

Compared with regularized Katyusha in Table 1, the adaptive regularization approach drops the need to estimate  $R_0$  or  $\Delta_0$  at the cost of a mere  $\frac{1}{\epsilon}$  factor in the non-dominant term (if  $\epsilon$  is small).

## 6 Discussion

In this work, we proposed several simple and practical schemes that complement existing works (Table 1). Admittedly, the new schemes are currently only limited to the unconstrained Euclidean setting, because our techniques heavily rely on the interpolation conditions (1) and (2). On the other hand, methods such as OGM [30], TM [51] and ITEM [55, 10], which also rely on these conditions, are still not known to have their proximal variants. We list a few future directions as follows.

(1) It is not clear how to naturally connect the parameters of M-OGM-G (Algorithm 2) to OGM-G (Algorithm 1). The parameters of both algorithms seem to be quite restrictive and hardly generalizable due to the special construction in (4). Does there exist an optimal method for minimizing the gradient norm that has a proper potential function (at each iteration)?

(2) Is this new “momentum” in OGM-G beneficial for training neural nets? Other classic momentum schemes such as NAG [40] or heavy-ball momentum method [49] are extremely effective for this task [53], and they were also originally proposed for convex objectives.

(3) Can we directly accelerate SARAH (L2S)? By extending OGM-G? It seems that existing stochastic acceleration techniques fail to accelerate SARAH (or result in poor dependence on  $n$  as in [16]).

<sup>8</sup>We assume that  $\epsilon$  is small such that  $\max \{\delta_{\text{IDC}}^*, \delta_{\text{IFC}}^*\} \leq \delta_0 = L$  for simplicity. In this case,  $\ell > 0$ .

<sup>9</sup>If Algorithm 4 does not terminate at outer iteration  $\ell$ , it terminates at the next outer iteration with probability at least  $1 - q/\beta$ . That is, it terminates with higher and higher probability. The same goes for the IFC case.

## References

- [1] Z. Allen-Zhu. Katyusha: The first direct acceleration of stochastic gradient methods. *Journal of Machine Learning Research*, 18(1):8194–8244, 2017. 2, 6, 26
- [2] Z. Allen-Zhu. How to make the gradients small stochastically: Even faster convex and nonconvex sgd. In *Advances in Neural Information Processing Systems*, pages 1157–1167, 2018. 1, 2, 8
- [3] Z. Allen-Zhu and Y. Yuan. Improved SVRG for Non-Strongly-Convex or Sum-of-Non-Convex Objectives. In *Proceedings of The 33rd International Conference on Machine Learning*, pages 1080–1089, 2016. 7
- [4] Z. Allen-Zhu, Y. Li, R. M. de Oliveira, and A. Wigderson. Much Faster Algorithms for Matrix Scaling. In C. Umans, editor, *58th IEEE Annual Symposium on Foundations of Computer Science*, pages 890–901, 2017. 1
- [5] A. Auslender and M. Teboulle. Interior gradient and proximal methods for convex and conic optimization. *SIAM Journal on Optimization*, 16(3):697–725, 2006. 6
- [6] N. Bansal and A. Gupta. Potential-Function Proofs for Gradient Methods. *Theory of Computing*, 15(4):1–32, 2019. 4
- [7] Y. Carmon, J. C. Duchi, O. Hinder, and A. Sidford. Lower bounds for finding stationary points ii: first-order methods. *Mathematical Programming*, 185(1-2), 2021. 1, 2, 3
- [8] C.-C. Chang and C.-J. Lin. LIBSVM: A library for support vector machines. *ACM Transactions on Intelligent Systems and Technology*, 2:27:1–27:27, 2011. Software available at <http://www.csie.ntu.edu.tw/~cjlin/libsvm>. 13, 14
- [9] M. B. Cohen, A. Madry, D. Tsipras, and A. Vladu. Matrix Scaling and Balancing via Box Constrained Newton’s Method and Interior Point Methods. In *IEEE 58th Annual Symposium on Foundations of Computer Science*, pages 902–913. IEEE, 2017. 1
- [10] A. d’Aspremont, D. Scieur, and A. Taylor. Acceleration methods. *arXiv preprint arXiv:2101.09545*, 2021. 9
- [11] D. Davis and D. Drusvyatskiy. Complexity of finding near-stationary points of convex functions stochastically. *arXiv preprint arXiv:1802.08556*, 2018. 8
- [12] A. Defazio. On the Curved Geometry of Accelerated Optimization. In *Advances in Neural Information Processing Systems*, volume 32, pages 1764–1773, 2019. 6
- [13] A. Defazio, F. R. Bach, and S. Lacoste-Julien. SAGA: A Fast Incremental Gradient Method With Support for Non-Strongly Convex Composite Objectives. In *Advances in Neural Information Processing Systems*, pages 1646–1654, 2014. 14
- [14] J. Diakonikolas and C. Guzmán. Complementary Composite Minimization, Small Gradients in General Norms, and Applications to Regression Problems. *arXiv preprint arXiv:2101.11041*, 2021. 1
- [15] J. Diakonikolas and P. Wang. Potential Function-based Framework for Making the Gradients Small in Convex and Min-Max Optimization. *arXiv preprint arXiv:2101.12101*, 2021. 1, 4
- [16] D. Driggs, M. J. Ehrhardt, and C.-B. Schönlieb. Accelerating variance-reduced stochastic gradient methods. *Mathematical Programming*, 2020. doi: 10.1007/s10107-020-01566-2. 6, 9
- [17] Y. Drori. The exact information-based complexity of smooth convex minimization. *Journal of Complexity*, 39:1–16, 2017. 1, 6
- [18] Y. Drori and A. Taylor. On the oracle complexity of smooth strongly convex minimization. *arXiv preprint arXiv:2101.09740*, 2021. 1
- [19] Y. Drori and M. Teboulle. Performance of first-order methods for smooth convex minimization: a novel approach. *Mathematical Programming*, 145(1-2):451–482, 2014. 1, 3, 5, 6
- [20] D. Dua and C. Graff. UCI machine learning repository, 2017. URL <http://archive.ics.uci.edu/ml>. 13, 14
- [21] C. Fang, C. J. Li, Z. Lin, and T. Zhang. SPIDER: Near-Optimal Non-Convex Optimization via Stochastic Path-Integrated Differential Estimator. In *Advances in Neural Information Processing Systems*, pages 687–697, 2018. 1

- [22] D. J. Foster, A. Sekhari, O. Shamir, N. Srebro, K. Sridharan, and B. Woodworth. The Complexity of Making the Gradient Small in Stochastic Convex Optimization. In *Proceedings of the Thirty-Second Conference on Learning Theory*, pages 1319–1345, 2019. 1, 2, 8
- [23] R. Ge, F. Huang, C. Jin, and Y. Yuan. Escaping From Saddle Points — Online Stochastic Gradient for Tensor Decomposition. In *Proceedings of The 28th Conference on Learning Theory*, pages 797–842, 2015. 1
- [24] S. Ghadimi and G. Lan. Optimal stochastic approximation algorithms for strongly convex stochastic composite optimization i: A generic algorithmic framework. *SIAM Journal on Optimization*, 22(4):1469–1492, 2012. 6
- [25] S. Ghadimi and G. Lan. Stochastic first-and zeroth-order methods for nonconvex stochastic programming. *SIAM Journal on Optimization*, 23(4):2341–2368, 2013. 1
- [26] S. Ghadimi and G. Lan. Accelerated gradient methods for nonconvex nonlinear and stochastic programming. *Mathematical Programming*, 156(1-2):59–99, 2016. 1
- [27] M. Ito and M. Fukuda. Nearly optimal first-order methods for convex optimization under gradient norm measure: An adaptive regularization approach. *Journal of Optimization Theory and Applications*, 188(3):770–804, 2021. 1, 2, 8
- [28] C. Jin, R. Ge, P. Netrapalli, S. M. Kakade, and M. I. Jordan. How to Escape Saddle Points Efficiently. In *Proceedings of the 34th International Conference on Machine Learning*, pages 1724–1732, 2017. 1
- [29] R. Johnson and T. Zhang. Accelerating Stochastic Gradient Descent using Predictive Variance Reduction. In *Advances in Neural Information Processing Systems*, pages 315–323, 2013. 3, 14
- [30] D. Kim and J. A. Fessler. Optimized first-order methods for smooth convex minimization. *Mathematical Programming*, 159(1):81–107, 2016. 1, 6, 9
- [31] D. Kim and J. A. Fessler. Another Look at the Fast Iterative Shrinkage/Thresholding Algorithm (FISTA). *SIAM Journal on Optimization*, 28(1):223–250, 2018. 1, 3
- [32] D. Kim and J. A. Fessler. Generalizing the optimized gradient method for smooth convex minimization. *SIAM Journal on Optimization*, 28(2):1920–1950, 2018. 1, 2, 3
- [33] D. Kim and J. A. Fessler. Optimizing the efficiency of first-order methods for decreasing the gradient of smooth convex functions. *Journal of Optimization Theory and Applications*, 188(1):192–219, 2021. 1, 2, 3, 4, 5
- [34] D. Kovalev, S. Horváth, and P. Richtárik. Don’t jump through hoops and remove those loops: SVRG and Katyusha are better without the outer loop. In *Algorithmic Learning Theory*, pages 451–467. PMLR, 2020. 6, 8
- [35] G. Lan. An optimal method for stochastic composite optimization. *Mathematical Programming*, 133(1-2):365–397, 2012. 6
- [36] G. Lan, Z. Li, and Y. Zhou. A unified variance-reduced accelerated gradient method for convex optimization. In *Advances in Neural Information Processing Systems*, volume 32, pages 10462–10472, 2019. 6, 7
- [37] B. Li, M. Ma, and G. B. Giannakis. On the Convergence of SARAH and Beyond. In *Proceedings of the Twenty Third International Conference on Artificial Intelligence and Statistics*, pages 223–233, 2020. 2, 14, 27
- [38] Z. Li. ANITA: An Optimal Loopless Accelerated Variance-Reduced Gradient Method. *arXiv preprint arXiv:2103.11333*, 2021. 6, 7
- [39] Q. Lin and L. Xiao. An Adaptive Accelerated Proximal Gradient Method and its Homotopy Continuation for Sparse Optimization. In *Proceedings of the 31th International Conference on Machine Learning*, pages 73–81, 2014. 1
- [40] Y. Nesterov. A method for solving the convex programming problem with convergence rate  $O(1/k^2)$ . In *Dokl. akad. nauk Sssr*, volume 269, pages 543–547, 1983. 1, 2, 9
- [41] Y. Nesterov. *Introductory lectures on convex optimization: A basic course*, volume 87. Springer Science & Business Media, 2003. 1
- [42] Y. Nesterov. How to make the gradients small. *Optima. Mathematical Optimization Society Newsletter*, (88):10–11, 2012. 1, 2, 5, 8, 22, 27

- [43] Y. Nesterov. Gradient methods for minimizing composite functions. *Mathematical Programming*, 140(1):125–161, 2013. 1
- [44] Y. Nesterov. *Lectures on convex optimization*, volume 137. Springer, 2018. 3, 18
- [45] Y. Nesterov, A. Gasnikov, S. Guminov, and P. Dvurechensky. Primal–dual accelerated gradient methods with small-dimensional relaxation oracle. *Optimization Methods and Software*, pages 1–38, 2020. 2
- [46] L. M. Nguyen, J. Liu, K. Scheinberg, and M. Takáč. SARAH: A Novel Method for Machine Learning Problems Using Stochastic Recursive Gradient. In *Proceedings of the 34th International Conference on Machine Learning*, pages 2613–2621, 2017. 1, 2
- [47] N. H. Pham, L. M. Nguyen, D. T. Phan, and Q. Tran-Dinh. ProxSARAH: An efficient algorithmic framework for stochastic composite nonconvex optimization. *Journal of Machine Learning Research*, 21(110):1–48, 2020. 1
- [48] J. Platt. Sequential minimal optimization: A fast algorithm for training support vector machines. 1998. 14
- [49] B. T. Polyak. Some methods of speeding up the convergence of iteration methods. *Ussr computational mathematics and mathematical physics*, 4(5):1–17, 1964. 4, 9
- [50] U. G. Rothblum and H. Schneider. Scalings of matrices which have prespecified row sums and column sums via optimization. *Linear Algebra and its Applications*, 114:737–764, 1989. 1
- [51] B. V. Scov, R. A. Freeman, and K. M. Lynch. The Fastest Known Globally Convergent First-Order Method for Minimizing Strongly Convex Functions. *IEEE Control Systems Letters*, 2(1):49–54, 2017. 9
- [52] C. Song, Y. Jiang, and Y. Ma. Variance Reduction via Accelerated Dual Averaging for Finite-Sum Optimization. In *Advances in Neural Information Processing Systems*, volume 33, pages 833–844, 2020. 6, 7
- [53] I. Sutskever, J. Martens, G. Dahl, and G. Hinton. On the importance of initialization and momentum in deep learning. In *Proceedings of the 30th International Conference on Machine Learning*, pages 1139–1147, 2013. 9
- [54] A. Taylor and F. Bach. Stochastic first-order methods: non-asymptotic and computer-aided analyses via potential functions. In *Conference on Learning Theory*, pages 2934–2992, 2019. 2, 3, 6, 7
- [55] A. Taylor and Y. Drori. An optimal gradient method for smooth strongly convex minimization. *arXiv preprint arXiv:2101.09741*, 2021. 1, 6, 9
- [56] A. B. Taylor, J. M. Hendrickx, and F. Glineur. Smooth strongly convex interpolation and exact worst-case performance of first-order methods. *Mathematical Programming*, 161(1-2):307–345, 2017. 3
- [57] P. Tseng. On accelerated proximal gradient methods for convex-concave optimization. <https://www.mit.edu/~dimitrib/PTseng/papers/apgm.pdf>, 2008. Accessed May 1, 2020. 6
- [58] B. E. Woodworth and N. Srebro. Tight Complexity Bounds for Optimizing Composite Objectives. In *Advances in Neural Information Processing Systems*, pages 3639–3647, 2016. 3, 7
- [59] L. Xiao and T. Zhang. A Proximal Stochastic Gradient Method with Progressive Variance Reduction. *SIAM Journal on Optimization*, 24(4):2057–2075, 2014. 3, 14
- [60] D. Zhou, P. Xu, and Q. Gu. Stochastic Nested Variance Reduction for Nonconvex Optimization. *Journal of Machine Learning Research*, 21:103:1–103:63, 2020. 1
- [61] K. Zhou, F. Shang, and J. Cheng. A Simple Stochastic Variance Reduced Algorithm with Fast Convergence Rates. In *Proceedings of the 35th International Conference on Machine Learning*, pages 5980–5989, 2018. 6
- [62] K. Zhou, Q. Ding, F. Shang, J. Cheng, D. Li, and Z.-Q. Luo. Direct Acceleration of SAGA using Sampled Negative Momentum. In *Proceedings of the Twenty Second International Conference on Artificial Intelligence and Statistics*, pages 1602–1610, 2019. 6
- [63] K. Zhou, A. M.-C. So, and J. Cheng. Boosting First-Order Methods by Shifting Objective: New Schemes with Faster Worst-Case Rates. In *Advances in Neural Information Processing Systems*, pages 15405–15416, 2020. 3, 8, 22

420 [64] Z. A. Zhu and L. Orecchia. Linear Coupling: An Ultimate Unification of Gradient and Mirror  
421 Descent. In *8th Innovations in Theoretical Computer Science Conference*, volume 67 of *LIPICs*,  
422 pages 3:1–3:22, 2017. 6

## 423 Checklist

- 424 1. For all authors...
- 425 (a) Do the main claims made in the abstract and introduction accurately reflect the paper’s  
426 contributions and scope? [Yes]
- 427 (b) Did you describe the limitations of your work? [Yes] See Section 6.
- 428 (c) Did you discuss any potential negative societal impacts of your work? [N/A] We are  
429 not aware of clear negative societal impacts since we focus on developing generic  
430 algorithms for convex optimization.
- 431 (d) Have you read the ethics review guidelines and ensured that your paper conforms to  
432 them? [Yes]
- 433 2. If you are including theoretical results...
- 434 (a) Did you state the full set of assumptions of all theoretical results? [Yes] See the  
435 introduction.
- 436 (b) Did you include complete proofs of all theoretical results? [Yes]
- 437 3. If you ran experiments...
- 438 (a) Did you include the code, data, and instructions needed to reproduce the main experi-  
439 mental results (either in the supplemental material or as a URL)? [Yes]
- 440 (b) Did you specify all the training details (e.g., data splits, hyperparameters, how they  
441 were chosen)? [Yes] See Appendix A.
- 442 (c) Did you report error bars (e.g., with respect to the random seed after running experi-  
443 ments multiple times)? [Yes] See Figure 1.
- 444 (d) Did you include the total amount of compute and the type of resources used (e.g., type  
445 of GPUs, internal cluster, or cloud provider)? [Yes] See Appendix A.
- 446 4. If you are using existing assets (e.g., code, data, models) or curating/releasing new assets...
- 447 (a) If your work uses existing assets, did you cite the creators? [Yes] See Appendix A.
- 448 (b) Did you mention the license of the assets? [Yes] LIBSVM [8] is under the BSD license.
- 449 (c) Did you include any new assets either in the supplemental material or as a URL? [Yes]
- 450 (d) Did you discuss whether and how consent was obtained from people whose data you’re  
451 using/curating? [Yes] Details can be found in the online dataset repositories [8, 20].
- 452 (e) Did you discuss whether the data you are using/curating contains personally identifiable  
453 information or offensive content? [Yes] Details can be found in the online dataset  
454 repositories [8, 20].
- 455 5. If you used crowdsourcing or conducted research with human subjects...
- 456 (a) Did you include the full text of instructions given to participants and screenshots, if  
457 applicable? [N/A]
- 458 (b) Did you describe any potential participant risks, with links to Institutional Review  
459 Board (IRB) approvals, if applicable? [N/A]
- 460 (c) Did you include the estimated hourly wage paid to participants and the total amount  
461 spent on participant compensation? [N/A]

# Supplementary Materials for “Practical Schemes for Finding Near-Stationary Points of Convex Finite-Sums”

## A Numerical results of Acc-SVRG-G (Algorithm 3)

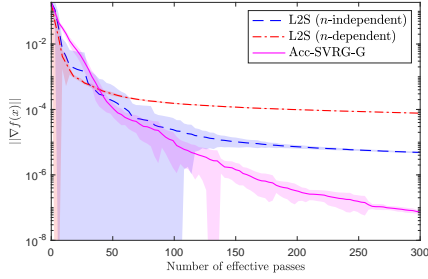

(a) a9a dataset. Measuring gradient norm.

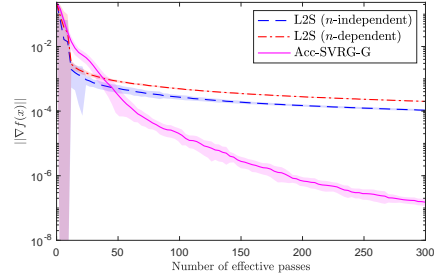

(b) w8a dataset. Measuring gradient norm.

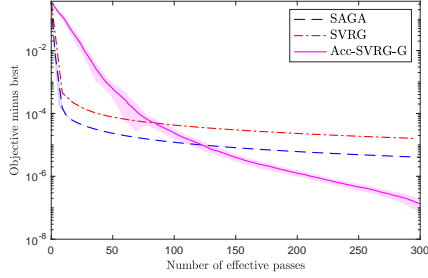

(c) a9a dataset. Measuring function value.

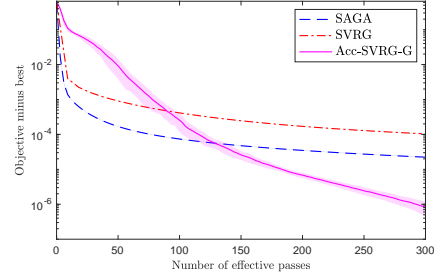

(d) w8a dataset. Measuring function value.

Figure 1: Performance evaluations. Run 20 seeds. Shaded bands indicate  $\pm 1$  standard deviation.

We did some experiments to justify the theoretical results (Theorem 4.2) of Acc-SVRG-G. We compared it to non-accelerated methods including L2S [37], SVRG [29, 59] and SAGA [13] under their original optimality measures. Note that other stochastic approaches in Table 1 require fixing the accuracy  $\epsilon$  in advance, and thus are not convenient to be compared in the form of Figure 1. For measuring gradient norm, we simply tracked the smallest norm of all the full gradient computed to reduce complexity. Since the figures are in logarithmic scale, the deviation bands are asymmetric, and will emphasize the passes that have large deviations.

**Setups.** We ran the experiments on a Macbook Pro with a quad-core Intel Core i7-4870HQ with 2.50GHz cores, 16GB RAM, macOS Big Sur with Clang 12.0.5 and MATLAB R2020b. We were optimizing the binary logistic regression problem  $f(x) = \frac{1}{n} \sum_{i=1}^n \log(1 + \exp(-b_i \langle a_i, x \rangle))$  with dataset  $a_i \in \mathbb{R}^d$ ,  $b_i \in \{-1, +1\}$ ,  $i \in [n]$ . We used datasets from the LIBSVM website [8], including a9a [20] (32,561 samples, 123 features) and w8a [48] (49,749 samples, 300 features). We added one dimension as bias to all the datasets. We normalized the datasets and thus for this problem,  $L = 0.25$ . For Acc-SVRG-G, we chose the parameters according to Theorem 4.2. For L2S, we set  $m = n$  and for its  $n$ -independent step size, we chose  $\eta = \frac{c}{L}$  and tuned  $c$  using the same grid specified in [37]; for the  $n$ -dependent step size, we set  $\eta = \frac{1}{L\sqrt{n}}$  according to Corollary 3 in [37]. For SAGA [13], we chose  $\eta = \frac{1}{3L}$  following its theory. For SVRG [59], we set  $\eta = \frac{1}{4L}$ .

## 483 B Proofs of Section 3

484 To simplify the proof, we denote  $D_k \triangleq f(x_k) - f(x^*)$ . And we use the following reformulation of  
 485 interpolation condition (1) at  $(x, y)$  to facilitate our proof.

$$\forall x, y \in \mathbb{R}^d, \frac{1}{2L} \left( \|\nabla f(x)\|^2 + \|\nabla f(y)\|^2 \right) + \left\langle \nabla f(y), x - y - \frac{1}{L} \nabla f(x) \right\rangle \leq f(x) - f(y). \quad (8)$$

### 486 B.1 Proof to Proposition 3.1

487 We define  $\theta_{N+1}^2 = \theta_N^2 - \theta_N = 0$ . At iteration  $k$ , we are going to combine the reformulated interpola-  
 488 tion conditions (8) at  $(x_k, x_{k+1})$  and  $(x_N, x_k)$  with multipliers  $\frac{1}{\theta_{k+1}^2}$  and  $\frac{1}{\theta_k \theta_{k+1}^2}$ , respectively.

$$\begin{aligned} & \frac{1}{2L\theta_{k+1}^2} \left( \|\nabla f(x_k)\|^2 + \|\nabla f(x_{k+1})\|^2 \right) + \frac{1}{\theta_{k+1}^2} \left\langle \nabla f(x_{k+1}), x_k - x_{k+1} - \frac{1}{L} \nabla f(x_k) \right\rangle \\ & \leq \frac{1}{\theta_{k+1}^2} (D_k - D_{k+1}), \end{aligned} \quad (9)$$

$$\begin{aligned} & \frac{1}{2L\theta_k \theta_{k+1}^2} \left( \|\nabla f(x_N)\|^2 + \|\nabla f(x_k)\|^2 \right) + \frac{1}{\theta_k \theta_{k+1}^2} \left\langle \nabla f(x_k), x_N - x_k - \frac{1}{L} \nabla f(x_N) \right\rangle \\ & \leq \frac{1}{\theta_k \theta_{k+1}^2} (D_N - D_k). \end{aligned} \quad (10)$$

489 Using the construction:  $x_k - x_{k+1} = \frac{1}{L} \nabla f(x_k) + (2\theta_{k+1}^3 - \theta_{k+1}^2) v_{k+1}$ , we can write (9) as

$$\begin{aligned} & \frac{1}{2L\theta_{k+1}^2} \left( \|\nabla f(x_k)\|^2 + \|\nabla f(x_{k+1})\|^2 \right) + (2\theta_{k+1} - 1) \langle \nabla f(x_{k+1}), v_{k+1} \rangle \\ & \leq \frac{1}{\theta_{k+1}^2} (D_k - D_{k+1}). \end{aligned} \quad (11)$$

490 Note that using  $\theta_k^2 - \theta_k = \theta_{k+1}^2$ , we have  $2\theta_{k+1}^3 - \theta_{k+1}^2 = \theta_{k+1}^4 - \theta_{k+2}^4$ . Then,

$$\begin{aligned} x_k - x_N &= \sum_{i=k}^{N-1} (x_i - x_{i+1}) = \frac{1}{L} \sum_{i=k}^{N-1} \nabla f(x_i) + \sum_{i=k}^{N-1} (\theta_{i+1}^4 - \theta_{i+2}^4) v_{i+1} \\ &= \frac{1}{L} \sum_{i=k}^{N-1} \nabla f(x_i) + \theta_{k+1}^4 v_{k+1} + \sum_{i=k}^{N-2} \theta_{i+2}^4 (v_{i+2} - v_{i+1}) \\ &\stackrel{(a)}{=} \frac{1}{L} \sum_{i=k}^{N-1} \nabla f(x_i) + \theta_{k+1}^4 v_{k+1} + \sum_{i=k}^{N-2} \frac{\theta_{i+2}^2}{L\theta_{i+1}} \nabla f(x_{i+1}) \\ &\stackrel{(b)}{=} \theta_{k+1}^4 v_k + \sum_{i=k}^{N-1} \frac{\theta_i}{L} \nabla f(x_i), \end{aligned}$$

491 where (a) and (b) use the construction:  $v_{k+1} = v_k + \frac{1}{L\theta_k \theta_{k+1}^2} \nabla f(x_k)$ .

492 Thus, (10) can be written as

$$\begin{aligned} \frac{1}{\theta_k \theta_{k+1}^2} (D_N - D_k) &\geq \frac{1}{2L\theta_k \theta_{k+1}^2} \|\nabla f(x_N)\|^2 - \frac{\theta_k^2 + \theta_{k+1}^2}{2L\theta_k^2 \theta_{k+1}^2} \|\nabla f(x_k)\|^2 \\ &\quad - \frac{\theta_{k+1}^2}{\theta_k} \langle \nabla f(x_k), v_k \rangle - \sum_{i=k+1}^N \frac{\theta_i}{L\theta_k \theta_{k+1}^2} \langle \nabla f(x_k), \nabla f(x_i) \rangle. \end{aligned}$$

Summing this inequality and (11), and using the relation  $\theta_k^2 - \theta_k = \theta_{k+1}^2$ , we obtain

$$\begin{aligned}
& \left( \frac{1}{\theta_{k+1}^2} - \frac{1}{\theta_k^2} \right) \left( D_N - \frac{1}{2L} \|\nabla f(x_N)\|^2 \right) + \left( \frac{1}{\theta_k^2} D_k - \frac{1}{\theta_{k+1}^2} D_{k+1} \right) \\
& \geq \left( \frac{1}{2L\theta_{k+1}^2} \|\nabla f(x_{k+1})\|^2 - \frac{1}{2L\theta_k^2} \|\nabla f(x_k)\|^2 \right) \\
& \quad + \left( \frac{\theta_{k+2}^2}{\theta_{k+1}} \langle \nabla f(x_{k+1}), v_{k+1} \rangle - \frac{\theta_{k+1}^2}{\theta_k} \langle \nabla f(x_k), v_k \rangle \right) \\
& \quad + \underbrace{\theta_{k+1} \langle \nabla f(x_{k+1}), v_{k+1} \rangle - \sum_{i=k+1}^N \frac{\theta_i}{L\theta_k\theta_{k+1}^2} \langle \nabla f(x_k), \nabla f(x_i) \rangle}_{\mathcal{R}_1}.
\end{aligned} \tag{12}$$

## B.2 Proof to Theorem 3.1

It is clear that except for  $\mathcal{R}_1$ , all terms in (12) telescope. Since  $v_{k+1} = \sum_{i=0}^k \frac{1}{L\theta_i\theta_{i+1}^2} \nabla f(x_i)$ , by defining a matrix  $P \in \mathbb{R}^{(N+1) \times (N+1)}$  with  $P_{ki} = \frac{\theta_k}{L\theta_i\theta_{i+1}^2} \langle \nabla f(x_k), \nabla f(x_i) \rangle$ , we can write  $\mathcal{R}_1$  as  $\sum_{i=0}^k P_{(k+1)i} - \sum_{i=k+1}^N P_{ik}$ . Summing these terms from  $k = 0$  to  $N - 1$ , we obtain

$$\sum_{k=0}^{N-1} \sum_{i=0}^k P_{(k+1)i} - \sum_{k=0}^{N-1} \sum_{i=k+1}^N P_{ik} = \sum_{k=1}^N \sum_{i=0}^{k-1} P_{ki} - \sum_{i=0}^{N-1} \sum_{k=i+1}^N P_{ki} = 0.$$

Both of the summations are equal to the sum of the lower triangular entries of  $P$ .

Then, telescoping (12) from  $k = 0$  to  $N - 1$  (note that  $v_0 = \mathbf{0}$ ), we obtain

$$\left( 1 - \frac{1}{\theta_0^2} \right) \left( D_N - \frac{1}{2L} \|\nabla f(x_N)\|^2 \right) \geq D_N - \frac{1}{\theta_0^2} D_0 + \frac{1}{2L} \|\nabla f(x_N)\|^2 - \frac{1}{2L\theta_0^2} \|\nabla f(x_0)\|^2.$$

Using  $D_0 \geq \frac{1}{2L} \|\nabla f(x_0)\|^2$  and  $D_N \geq \frac{1}{2L} \|\nabla f(x_N)\|^2$ , we obtain

$$\|\nabla f(x_N)\|^2 \leq \frac{2LD_0}{\theta_0^2}.$$

Since  $\theta_k = \frac{1 + \sqrt{1 + 4\theta_{k+1}^2}}{2} \geq \frac{1}{2} + \theta_{k+1} \Rightarrow \theta_k \geq \frac{N-k}{2} + 1 \Rightarrow \theta_0 \geq \frac{N+2}{2}$ , we have

$$\|\nabla f(x_N)\|^2 \leq \frac{8L(f(x_0) - f(x^*))}{(N+2)^2}.$$

## B.3 Proof to Theorem 3.2

Define for  $k = 0, \dots, N$ ,

$$\tau_k \triangleq \frac{(N-k+2)(N-k+3)}{6}, \quad \delta_{k+1} \triangleq \frac{12}{(N-k+1)(N-k+2)(N-k+3)} = \frac{1}{\tau_{k+1}} - \frac{1}{\tau_k}.$$

At iteration  $k$ , we are going to combine the reformulated interpolation conditions (8) at  $(x_k, x_{k+1})$  and  $(x_N, x_k)$  with multipliers  $\frac{1}{\tau_{k+1}}$  and  $\delta_{k+1}$ , respectively.

$$\begin{aligned}
& \frac{1}{2L\tau_{k+1}} \left( \|\nabla f(x_k)\|^2 + \|\nabla f(x_{k+1})\|^2 \right) + \frac{1}{\tau_{k+1}} \left\langle \nabla f(x_{k+1}), x_k - x_{k+1} - \frac{1}{L} \nabla f(x_k) \right\rangle \\
& \leq \frac{1}{\tau_{k+1}} (D_k - D_{k+1}),
\end{aligned} \tag{13}$$

$$\begin{aligned}
& \frac{\delta_{k+1}}{2L} \left( \|\nabla f(x_N)\|^2 + \|\nabla f(x_k)\|^2 \right) + \delta_{k+1} \left\langle \nabla f(x_k), x_N - x_k - \frac{1}{L} \nabla f(x_N) \right\rangle \\
& \leq \delta_{k+1} (D_N - D_k).
\end{aligned} \tag{14}$$

506 Note that from the construction of Algorithm 2,

$$\begin{aligned} x_k - x_{k+1} - \frac{1}{L} \nabla f(x_k) &= \frac{(N-k)(N-k+1)(N-k+2)}{6} v_{k+1}, \\ x_k - x_N &= \sum_{i=k}^{N-1} \frac{1}{L} \nabla f(x_i) + \sum_{i=k}^{N-1} \frac{(N-i)(N-i+1)(N-i+2)}{6} v_{i+1}. \end{aligned}$$

507 Thus, (13) can be written as

$$\frac{1}{2L\tau_{k+1}} \left( \|\nabla f(x_k)\|^2 + \|\nabla f(x_{k+1})\|^2 \right) + (N-k) \langle \nabla f(x_{k+1}), v_{k+1} \rangle \leq \frac{1}{\tau_{k+1}} (D_k - D_{k+1}). \quad (15)$$

508 Defining  $\mathcal{Q}(j) \triangleq (j+3)(j+2)(j+1)j$ , we have  $\mathcal{Q}(j) - \mathcal{Q}(j-1) = 4j(j+1)(j+2)$ . Then,

$$\begin{aligned} x_k - x_N &= \sum_{i=k}^{N-1} \frac{1}{L} \nabla f(x_i) + \frac{1}{24} \sum_{i=k}^{N-1} (\mathcal{Q}(N-i) - \mathcal{Q}(N-i-1)) v_{i+1} \\ &= \sum_{i=k}^{N-1} \frac{1}{L} \nabla f(x_i) + \frac{1}{24} \left( \mathcal{Q}(N-k) v_{k+1} + \sum_{i=k+1}^{N-1} \mathcal{Q}(N-i) (v_{i+1} - v_i) \right) \\ &\stackrel{(a)}{=} \frac{\mathcal{Q}(N-k)}{24} v_{k+1} + \frac{1}{L} \nabla f(x_k) + \sum_{i=k+1}^{N-1} \frac{1}{L} \left( \frac{\mathcal{Q}(N-i)\delta_{i+1}}{24} + 1 \right) \nabla f(x_i) \\ &\stackrel{(b)}{=} \frac{\mathcal{Q}(N-k)}{24} v_k + \sum_{i=k}^{N-1} \frac{N-i+2}{2L} \nabla f(x_i), \end{aligned}$$

509 where (a) and (b) use the construction  $v_{k+1} = v_k + \frac{\delta_{k+1}}{L} \nabla f(x_k)$ .

510 Thus, (14) can be written as

$$\begin{aligned} &\delta_{k+1} (D_N - D_k) \\ &\geq \frac{\delta_{k+1}}{2L} \left( \|\nabla f(x_N)\|^2 + \|\nabla f(x_k)\|^2 \right) - \frac{N-k}{2} \langle \nabla f(x_k), v_k \rangle \\ &\quad - \frac{(N-k+2)\delta_{k+1}}{2L} \|\nabla f(x_k)\|^2 - \sum_{i=k+1}^N \frac{(N-i+2)\delta_{k+1}}{2L} \langle \nabla f(x_k), \nabla f(x_i) \rangle. \end{aligned}$$

511 Summing the above inequality and (15), we obtain

$$\begin{aligned} &\left( \frac{1}{\tau_{k+1}} - \frac{1}{\tau_k} \right) \left( D_N - \frac{1}{2L} \|\nabla f(x_N)\|^2 \right) + \left( \frac{1}{\tau_k} D_k - \frac{1}{\tau_{k+1}} D_{k+1} \right) \\ &\geq \left( \frac{1}{2L\tau_{k+1}} \|\nabla f(x_{k+1})\|^2 - \frac{1}{2L\tau_k} \|\nabla f(x_k)\|^2 \right) + \frac{\delta_{k+1}}{2L} \|\nabla f(x_k)\|^2 \\ &\quad + \left( \frac{N-k-1}{2} \langle \nabla f(x_{k+1}), v_{k+1} \rangle - \frac{N-k}{2} \langle \nabla f(x_k), v_k \rangle \right) \\ &\quad + \frac{N-k+1}{2} \langle \nabla f(x_{k+1}), v_{k+1} \rangle - \sum_{i=k+1}^N \frac{(N-i+2)\delta_{k+1}}{2L} \langle \nabla f(x_k), \nabla f(x_i) \rangle. \end{aligned} \quad (16)$$

512 Since  $v_{k+1} = \sum_{i=0}^k \frac{\delta_{i+1}}{L} \nabla f(x_i)$ , the last two terms above have a similar structure as  $\mathcal{R}_1$  at (12).

513 Define a matrix  $P \in \mathbb{R}^{(N+1) \times (N+1)}$  with  $P_{ki} = \frac{(N-k+2)\delta_{i+1}}{2L} \langle \nabla f(x_k), \nabla f(x_i) \rangle$ . The last two terms

514 above can be written as  $\sum_{i=0}^k P_{(k+1)i} - \sum_{i=k+1}^N P_{ik}$ . If we sum these terms from  $k = 0, \dots, N-1$ ,

515 they sum up to 0 (see Section B.2). Then, by telescoping (16) from  $k = 0, \dots, N-1$ , we obtain

$$\begin{aligned} &\frac{1}{2L} \|\nabla f(x_N)\|^2 - \frac{1}{2L\tau_0} \|\nabla f(x_0)\|^2 + \frac{1 - \frac{1}{\tau_0}}{2L} \|\nabla f(x_N)\|^2 + \sum_{k=0}^{N-1} \frac{\delta_{k+1}}{2L} \|\nabla f(x_k)\|^2 \\ &\leq \left( 1 - \frac{1}{\tau_0} \right) D_N + \frac{1}{\tau_0} D_0 - D_N. \end{aligned}$$

516 Finally, using  $D_0 \geq \frac{1}{2L} \|\nabla f(x_0)\|^2$  and  $D_N \geq \frac{1}{2L} \|\nabla f(x_N)\|^2$ , we obtain

$$\|\nabla f(x_N)\|^2 + \sum_{k=0}^{N-1} \frac{\delta_{k+1}}{2} \|\nabla f(x_k)\|^2 \leq \frac{2L}{\tau_0} D_0 = \frac{12L(f(x_0) - f(x^*))}{(N+2)(N+3)}. \quad (17)$$

#### 517 B.4 Proof to Corollary 3.2.1

518 We assume  $N$  is divisible by 2 for simplicity. After running  $N/2$  iterations of NAG, we obtain an  
519 output  $x_{N/2}$  satisfying (cf. Theorem 2.2.2 in [44])

$$f(x_{N/2}) - f(x^*) = O\left(\frac{LR_0^2}{N^2}\right).$$

520 Then, let  $x_{N/2}$  be the input of Algorithm 2. Using (17), after running another  $N/2$  iterations of  
521 Algorithm 2, we obtain

$$\|\nabla f(x_N)\|^2 = O\left(\frac{L^2 R_0^2}{N^4}\right).$$

### 522 C Proofs of Section 4

#### 523 C.1 Proof to Proposition 4.1

524 Using the interpolation condition (1) at  $(x^*, y_k)$ , we obtain

$$\begin{aligned} f(y_k) - f(x^*) &\leq \langle \nabla f(y_k), y_k - x^* \rangle - \frac{1}{2L} \|\nabla f(y_k)\|^2 \\ &\stackrel{(\star)}{\leq} \frac{1 - \tau_k}{\tau_k} \langle \nabla f(y_k), \tilde{x}_k - y_k \rangle - \frac{1 - \tau_k}{L\tau_k} \langle \nabla f(y_k), \nabla f(\tilde{x}_k) \rangle \\ &\quad + \langle \nabla f(y_k), z_k - x^* \rangle - \frac{1}{2L} \|\nabla f(y_k)\|^2, \end{aligned} \quad (18)$$

525 where  $(\star)$  follows from the construction  $y_k = \tau_k z_k + (1 - \tau_k)(\tilde{x}_k - \frac{1}{L} \nabla f(\tilde{x}_k))$ .

526 From the optimality condition of Step 3, we can conclude that

$$\begin{aligned} \mathcal{G}_k + \alpha_k(z_{k+1} - z_k) &= \mathbf{0} \\ \stackrel{(a)}{\Rightarrow} \langle \mathcal{G}_k, z_k - x^* \rangle &= \frac{1}{2\alpha_k} \|\mathcal{G}_k\|^2 + \frac{\alpha_k}{2} (\|z_k - x^*\|^2 - \|z_{k+1} - x^*\|^2) \\ \stackrel{(b)}{\Rightarrow} \langle \nabla f(y_k), z_k - x^* \rangle &= \frac{1}{2\alpha_k} \mathbb{E}_{i_k} [\|\mathcal{G}_k\|^2] + \frac{\alpha_k}{2} (\|z_k - x^*\|^2 - \mathbb{E}_{i_k} [\|z_{k+1} - x^*\|^2]), \end{aligned} \quad (19)$$

527 where (a) uses  $\langle u, v \rangle = \frac{1}{2}(\|u\|^2 + \|v\|^2 - \|u - v\|^2)$  and (b) follows from taking the expectation  
528 wrt sample  $i_k$ .

529 Using the interpolation condition (1) at  $(\tilde{x}_k, y_k)$ , we can bound  $\mathbb{E}_{i_k} [\|\mathcal{G}_k\|^2]$  as

$$\begin{aligned} \mathbb{E}_{i_k} [\|\mathcal{G}_k\|^2] &= \mathbb{E}_{i_k} [\|\nabla f_{i_k}(y_k) - \nabla f_{i_k}(\tilde{x}_k)\|^2] + 2 \langle \nabla f(y_k), \nabla f(\tilde{x}_k) \rangle - \|\nabla f(\tilde{x}_k)\|^2 \\ &\leq 2L(f(\tilde{x}_k) - f(y_k) - \langle \nabla f(y_k), \tilde{x}_k - y_k \rangle) + 2 \langle \nabla f(y_k), \nabla f(\tilde{x}_k) \rangle \\ &\quad - \|\nabla f(\tilde{x}_k)\|^2. \end{aligned} \quad (20)$$

530 Combine (18), (19) and (20).

$$\begin{aligned} f(y_k) - f(x^*) &\leq \frac{L}{\alpha_k} (f(\tilde{x}_k) - f(y_k)) + \left( \frac{1 - \tau_k}{\tau_k} - \frac{L}{\alpha_k} \right) \langle \nabla f(y_k), \tilde{x}_k - y_k \rangle \\ &\quad + \left( \frac{1}{\alpha_k} - \frac{1 - \tau_k}{L\tau_k} \right) \langle \nabla f(y_k), \nabla f(\tilde{x}_k) \rangle \\ &\quad + \frac{\alpha_k}{2} (\|z_k - x^*\|^2 - \mathbb{E}_{i_k} [\|z_{k+1} - x^*\|^2]) \\ &\quad - \frac{1}{2L} \|\nabla f(y_k)\|^2 - \frac{1}{2\alpha_k} \|\nabla f(\tilde{x}_k)\|^2. \end{aligned}$$

531 Substitute the choice  $\alpha_k = \frac{L\tau_k}{1-\tau_k}$ .

$$\begin{aligned} \frac{1-\tau_k}{\tau_k^2} (f(y_k) - f(x^*)) &\leq \frac{(1-\tau_k)^2}{\tau_k^2} (f(\tilde{x}_k) - f(x^*)) + \frac{L}{2} \left( \|z_k - x^*\|^2 - \mathbb{E}_{i_k} [\|z_{k+1} - x^*\|^2] \right) \\ &\quad - \frac{1-\tau_k}{2L\tau_k} \|\nabla f(y_k)\|^2 - \frac{(1-\tau_k)^2}{2L\tau_k^2} \|\nabla f(\tilde{x}_k)\|^2. \end{aligned} \quad (21)$$

532 Note that by construction,  $\mathbb{E}[f(\tilde{x}_{k+1})] = p_k \mathbb{E}[f(y_k)] + (1-p_k) \mathbb{E}[f(\tilde{x}_k)]$ , and thus

$$\begin{aligned} \frac{1-\tau_k}{\tau_k^2 p_k} \mathbb{E}[f(\tilde{x}_{k+1}) - f(x^*)] &\leq \frac{(1-\tau_k p_k)(1-\tau_k)}{\tau_k^2 p_k} \mathbb{E}[f(\tilde{x}_k) - f(x^*)] \\ &\quad + \frac{L}{2} \left( \mathbb{E}[\|z_k - x^*\|^2] - \mathbb{E}[\|z_{k+1} - x^*\|^2] \right) \\ &\quad - \frac{1-\tau_k}{2L\tau_k} \mathbb{E}[\|\nabla f(y_k)\|^2] - \frac{(1-\tau_k)^2}{2L\tau_k^2} \mathbb{E}[\|\nabla f(\tilde{x}_k)\|^2]. \end{aligned}$$

## 533 C.2 Proof to Theorem 4.1

534 It can be easily verified that under this choice ( $p_k \equiv \frac{1}{n}$ ,  $\tau_k = \frac{3}{k/n+6}$ ), for any  $k \geq 0, n \geq 1$ ,

$$\frac{(1-\tau_{k+1} p_{k+1})(1-\tau_{k+1})}{\tau_{k+1}^2 p_{k+1}} \leq \frac{1-\tau_k}{\tau_k^2 p_k}.$$

535 Then, using Proposition 4.1, after summing (6) from  $k = 0, \dots, K-1$ , we obtain

$$\begin{aligned} &\frac{n(1-\tau_{K-1})}{\tau_{K-1}^2} \mathbb{E}[f(\tilde{x}_K) - f(x^*)] + \frac{L}{2} \mathbb{E}[\|z_K - x^*\|^2] + \sum_{k=0}^{K-1} \frac{(1-\tau_k)^2}{2L\tau_k^2} \mathbb{E}[\|\nabla f(\tilde{x}_k)\|^2] \\ &\leq (2n-1)(f(x_0) - f(x^*)) + \frac{L}{2} \|x_0 - x^*\|^2. \end{aligned}$$

536 Note that  $\tau_k \leq \frac{1}{2}, \forall k$ . We have the following two consequences of the above inequality.

$$\begin{aligned} \mathbb{E}[f(\tilde{x}_K)] - f(x^*) &\leq \tau_{K-1}^2 \left( 4(f(x_0) - f(x^*)) + \frac{L}{n} \|x_0 - x^*\|^2 \right), \\ \mathbb{E}[\|\nabla f(x_{\text{out}})\|^2] &= \frac{1}{\sum_{k=0}^{K-1} \tau_k^{-2}} \sum_{k=0}^{K-1} \frac{1}{\tau_k^2} \mathbb{E}[\|\nabla f(\tilde{x}_k)\|^2] \\ &\leq \frac{16nL(f(x_0) - f(x^*)) + 4L^2 \|x_0 - x^*\|^2}{\sum_{k=0}^{K-1} \tau_k^{-2}}. \end{aligned}$$

537 Substituting the parameter choice, we obtain

$$\begin{aligned} \mathbb{E}[f(\tilde{x}_K)] - f(x^*) &\leq \frac{36n^2(f(x_0) - f(x^*)) + 9nL \|x_0 - x^*\|^2}{(K+6n-1)^2} = \epsilon_f, \\ \mathbb{E}[\|\nabla f(x_{\text{out}})\|^2] &\leq \frac{144nL(f(x_0) - f(x^*)) + 36L^2 \|x_0 - x^*\|^2}{\sum_{k=0}^{K-1} \left(\frac{k}{n} + 6\right)^2}. \end{aligned}$$

538 Note that

$$\sum_{k=0}^{K-1} \left(\frac{k}{n} + 6\right)^2 \geq \int_0^K \left(\frac{x-1}{n} + 6\right)^2 dx = \frac{(K+6n-1)^3 - (6n-1)^3}{3n^2}.$$

539 Thus,

$$\mathbb{E}[\|\nabla f(x_{\text{out}})\|^2] \leq \mathbb{E}[\|\nabla f(x_{\text{out}})\|^2] \leq \frac{432n^3L(f(x_0) - f(x^*)) + 108n^2L^2 \|x_0 - x^*\|^2}{(K+6n-1)^3 - (6n-1)^3} = \epsilon_g^2.$$

Since the expected iteration cost of Algorithm 3 is  $\mathbb{E}[\#\text{grad}_k] = p_k(n+2) + (1-p_k)2 = 3$ ,  
to guarantee  $\mathbb{E}[\|\nabla f(x_{\text{out}})\|] \leq \epsilon_g$  and  $\mathbb{E}[f(\tilde{x}_K)] - f(x^*) \leq \epsilon_f$ , the total oracle complexities are  
 $O\left(\frac{n(L(f(x_0)-f(x^*)))^{1/3}}{\epsilon_g^{2/3}} + \frac{(nLR_0)^{2/3}}{\epsilon_g^{2/3}}\right)$  and  $O\left(n\sqrt{\frac{f(x_0)-f(x^*)}{\epsilon_f}} + \frac{\sqrt{nLR_0}}{\sqrt{\epsilon_f}}\right)$ , respectively.

### C.3 Proof to Theorem 4.2

First, it can be verified that for any  $k \geq 0, n \geq 1$ , the following inequality holds.

$$\frac{(1-\tau_{k+1}p_{k+1})(1-\tau_{k+1})}{\tau_{k+1}^2 p_{k+1}} \leq \frac{1-\tau_k}{\tau_k^2 p_k}.$$

The verification can be done by considering the two cases: (i)  $k+8 < 6n$ , where  $p_k = \frac{6}{k+8}, \tau_k = \frac{1}{2}$ ,  
(ii)  $k+8 \geq 6n$ , in which  $p_k = \frac{1}{n}, \tau_k = \frac{3n}{k+8}$ .

Then, using Proposition 4.1, after summing (6) from  $k = 0, \dots, K-1$ , we obtain

$$\begin{aligned} & \frac{1-\tau_{K-1}}{\tau_{K-1}^2 p_{K-1}} \mathbb{E}[f(\tilde{x}_K) - f(x^*)] + \frac{L}{2} \mathbb{E}[\|z_K - x^*\|^2] + \sum_{k=0}^{K-1} \frac{(1-\tau_k)^2}{2L\tau_k^2} \mathbb{E}[\|\nabla f(\tilde{x}_k)\|^2] \\ & \leq \frac{5}{3}(f(x_0) - f(x^*)) + \frac{L}{2} \|x_0 - x^*\|^2 \leq \frac{4}{3}LR_0^2. \end{aligned}$$

Note that  $\tau_k \leq \frac{1}{2}, \forall k$ . We can conclude the following two consequences.

$$\mathbb{E}[f(\tilde{x}_K)] - f(x^*) \leq \frac{8}{3}\tau_{K-1}^2 p_{K-1}LR_0^2, \quad (22)$$

$$\mathbb{E}[\|\nabla f(x_{\text{out}})\|^2] = \frac{1}{\sum_{k=0}^{K-1} \tau_k^{-2}} \sum_{k=0}^{K-1} \frac{1}{\tau_k^2} \mathbb{E}[\|\nabla f(\tilde{x}_k)\|^2] \leq \frac{32L^2R_0^2}{3\sum_{k=0}^{K-1} \tau_k^{-2}}. \quad (23)$$

Now we consider two stages.

**Stage I (low accuracy stage):**  $K+8 \leq 6n$ . In this stage, let the accuracies be  $\epsilon_g^2 = \frac{8L^2R_0^2}{3K} \geq \frac{8L^2R_0^2}{3(6n-8)}$   
and  $\epsilon_f = \frac{4LR_0^2}{K+7} \geq \frac{4LR_0^2}{6n-1}$ . By substituting the parameter choice, (22) and (23) can be written as

$$\begin{aligned} \mathbb{E}[f(\tilde{x}_K)] - f(x^*) & \leq \frac{4LR_0^2}{K+7} = \epsilon_f, \\ \mathbb{E}[\|\nabla f(x_{\text{out}})\|^2] & \leq \mathbb{E}[\|\nabla f(\tilde{x}_K)\|^2] \leq \frac{8L^2R_0^2}{3K} = \epsilon_g^2. \end{aligned}$$

Note that the expected iteration cost of Algorithm 3 is  $\mathbb{E}[\#\text{grad}_k] = p_k(n+2) + (1-p_k)2 = np_k + 2$ ,  
and thus the total complexity in this stage is

$$\sum_{k=0}^{K-1} \mathbb{E}[\#\text{grad}_k] = n \sum_{k=0}^{K-1} \frac{6}{k+8} + 2K \leq 6n \log(K+7) + 12n = O(n \log K).$$

Thus, the expected oracle complexities in this stage are  $O(n \log \frac{LR_0}{\epsilon_g})$  and  $O(n \log \frac{LR_0^2}{\epsilon_f})$ , respectively.

**Stage II (high accuracy stage):**  $K+8 > 6n$ . In this stage, Algorithm 3 proceeds to find highly  
accurate solutions (i.e.,  $\epsilon_g^2 < \frac{8L^2R_0^2}{3(6n-8)}$  and  $\epsilon_f < \frac{4LR_0^2}{6n-1}$ ). Substituting the parameter choice, we can  
write (22) and (23) as

$$\mathbb{E}[f(\tilde{x}_K)] - f(x^*) \leq \frac{24nLR_0^2}{(K+7)^2} = \epsilon_f, \quad (24)$$

$$\mathbb{E}[\|\nabla f(x_{\text{out}})\|^2] \leq \frac{32L^2R_0^2}{3\left(24n - 28 + \sum_{k=6n-7}^{K-1} \tau_k^{-2}\right)} \stackrel{(*)}{\leq} \frac{288n^2L^2R_0^2}{(K+7)^3 + 432n^3 - 756n^2} = \epsilon_g^2, \quad (25)$$

558 where  $(\star)$  follows from

$$\sum_{k=6n-7}^{K-1} \tau_k^{-2} = \frac{1}{9n^2} \sum_{k=6n-7}^{K-1} (k+8)^2 \geq \frac{1}{9n^2} \int_{6n-7}^K (x+7)^2 dx = \frac{(K+7)^3}{27n^2} - 8n.$$

559 Then, we count the expected complexity in this stage.

$$\sum_{k=0}^{K-1} \mathbb{E}[\#\text{grad}_k] = n \left( \sum_{k=0}^{6n-8} \frac{6}{k+8} + \sum_{k=6n-7}^{K-1} \frac{1}{n} \right) + 2K \leq 6n \log(6n) + 3K - 6n + 7.$$

560 Finally, combining with (24) and (25), we can conclude that the total expected oracle complexities in  
561 this stage are  $O\left(n \log n + \frac{(nLR_0)^{2/3}}{\epsilon_g^{2/3}}\right)$  and  $O\left(n \log n + \frac{\sqrt{nLR_0}}{\sqrt{\epsilon_f}}\right)$ , respectively.

#### 562 C.4 Proof to Theorem 4.3

563 We start at inequality (21) in the proof of Proposition 4.1, which is the consequence of one iteration  $k$   
564 in Algorithm 3. Due to the constant choice of  $\tau_k \equiv \tau$ , we have

$$\begin{aligned} f(y_k) - f(x^*) &\leq (1-\tau)(f(\tilde{x}_k) - f(x^*)) + \frac{L\tau^2}{2(1-\tau)} \left( \|z_k - x^*\|^2 - \mathbb{E}_{i_k} [\|z_{k+1} - x^*\|^2] \right) \\ &\quad - \frac{\tau}{2L} \|\nabla f(y_k)\|^2 - \frac{1-\tau}{2L} \|\nabla f(\tilde{x}_k)\|^2. \end{aligned}$$

565 Since we fix  $p_k \equiv p$  as a constant and terminate Algorithm 3 at the first time  $\tilde{x}_{k+1} = y_k$  (denoted  
566 as the iteration  $N$ ), it is clear that the random variable  $N$  follows the geometric distribution with  
567 parameter  $p$ , that is, for  $k = 0, 1, 2, \dots$ ,  $\text{Prob}\{N = k\} = (1-p)^k p$ . Moreover, since we have  
568  $\tilde{x}_N = \tilde{x}_{N-1} = \dots = \tilde{x}_0 = x_0$ , using the above inequality at iteration  $N$ , we obtain

$$\begin{aligned} \mathbb{E}[f(\tilde{x}_{N+1})] - f(x^*) &\leq (1-\tau)(f(x_0) - f(x^*)) + \frac{L\tau^2}{2(1-\tau)} \left( \mathbb{E}[\|z_N - x^*\|^2 - \|z_{N+1} - x^*\|^2] \right) \\ &\quad - \frac{\tau}{2L} \mathbb{E}[\|\nabla f(\tilde{x}_{N+1})\|^2] - \frac{1-\tau}{2L} \|\nabla f(x_0)\|^2 \\ &\stackrel{(\star)}{=} (1-\tau)(f(x_0) - f(x^*)) + \frac{L\tau^2 p}{2(1-\tau)} \left( \|x_0 - x^*\|^2 - \mathbb{E}[\|z_{N+1} - x^*\|^2] \right) \\ &\quad - \frac{\tau}{2L} \mathbb{E}[\|\nabla f(\tilde{x}_{N+1})\|^2] - \frac{1-\tau}{2L} \|\nabla f(x_0)\|^2, \end{aligned}$$

569 where  $(\star)$  follows from

$$\begin{aligned} \mathbb{E}[\|z_{N+1} - x^*\|^2] &= \frac{1}{1-p} \left( \sum_{k=0}^{\infty} (1-p)^k p \mathbb{E}[\|z_k - x^*\|^2] - p \|z_0 - x^*\|^2 \right) \\ &= \frac{1}{1-p} \left( \mathbb{E}[\|z_N - x^*\|^2] - p \|z_0 - x^*\|^2 \right). \end{aligned}$$

570 Thus, we can conclude that

$$\mathbb{E}[f(\tilde{x}_{N+1})] - f(x^*) + \frac{\tau}{2L} \mathbb{E}[\|\nabla f(\tilde{x}_{N+1})\|^2] \leq \frac{L}{2} \left( 1-\tau + \frac{\tau^2 p}{1-\tau} \right) R_0^2.$$

571 Note that  $\mathbb{E}[N] = \frac{1-p}{p}$  and the total expected oracle complexity is  $n + 2(\mathbb{E}[N] + 1) = n + \frac{2}{p}$ . We  
572 choose  $p = \frac{1}{n}$ , which leads to an  $O(n)$  expected complexity. And we choose  $\tau$  by minimizing the  
573 ratio  $\left( 1-\tau + \frac{\tau^2 p}{1-\tau} \right)$  wrt  $\tau$ . This gives  $\tau = 1 - \frac{1}{\sqrt{n+1}} \geq \frac{1}{4}$  and

$$\mathbb{E}[f(\tilde{x}_{N+1})] - f(x^*) + \frac{1}{8L} \mathbb{E}[\|\nabla f(\tilde{x}_{N+1})\|^2] \leq \frac{LR_0^2}{\sqrt{n+1} + 1}.$$

## D Proofs of Section 5

We analyze Algorithm 4 following the “shifting” methodology in [63], which explores the tight interpolation condition (2) and leads to a simple and clean proof.

Note that after the regularization at Step 2, each  $f_i^{\delta_t}$  is  $(L + \delta_t)$ -smooth and  $\delta_t$ -strongly convex. We denote  $x_{\delta_t}^*$  as the unique minimizer of  $\min_x f_i^{\delta_t}(x)$ . Following [63], we define a “shifted” version of this problem:  $\min_x h_i^{\delta_t}(x) = \frac{1}{n} \sum_{i=1}^n h_i^{\delta_t}(x)$ , where

$$h_i^{\delta_t}(x) = f_i^{\delta_t}(x) - f_i^{\delta_t}(x_{\delta_t}^*) - \left\langle \nabla f_i^{\delta_t}(x_{\delta_t}^*), x - x_{\delta_t}^* \right\rangle - \frac{\delta_t}{2} \|x - x_{\delta_t}^*\|^2, \forall i.$$

It can be easily verified that each  $h_i^{\delta_t}$  is  $L$ -smooth and convex. Note that  $h_i^{\delta_t}(x_{\delta_t}^*) = h^{\delta_t}(x_{\delta_t}^*) = 0$  and  $\nabla h_i^{\delta_t}(x_{\delta_t}^*) = \nabla h^{\delta_t}(x_{\delta_t}^*) = \mathbf{0}$ , which means that  $h^{\delta_t}$  and  $f^{\delta_t}$  share the same minimizer  $x_{\delta_t}^*$ .

Then, conceptually, we attempt to solve the “shifted” problem using an “shifted” SVRG gradient estimator:  $\mathcal{H}_k^{\delta_t} \triangleq \nabla h_{i_k}^{\delta_t}(y_k) - \nabla h_{i_k}^{\delta_t}(\tilde{x}_k) + \nabla h^{\delta_t}(\tilde{x}_k)$ . Clearly, the gradient of  $h^{\delta_t}$  is not accessible due to the unknown  $x_{\delta_t}^*$ . Zhou et al. [63] proposed a technical lemma (Lemma 1 below) to bypass this issue. Since the relation  $\mathcal{H}_k^{\delta_t} = \mathcal{G}_k^{\delta_t} - \delta_t(y_k - x_{\delta_t}^*)$  holds, we can use Lemma 1 as an instantiation of the “shifted” gradient oracle, see [63] for details.

### D.1 Technical Lemmas

**Lemma 1** (Lemma 1 in [63], the “shifting” technique). *Given a gradient estimator  $\mathcal{G}_y$  and vectors  $z^+, z^-, y, x^* \in \mathbb{R}^d$ , fix the updating rule  $z^+ = \arg \min_x \{ \langle \mathcal{G}_y, x \rangle + \frac{\alpha}{2} \|x - z^-\|^2 + \frac{\delta}{2} \|x - y\|^2 \}$ . Suppose that we have a shifted gradient estimator  $\mathcal{H}_y$  satisfying the relation  $\mathcal{H}_y = \mathcal{G}_y - \delta(y - x^*)$ , it holds that*

$$\langle \mathcal{H}_y, z^- - x^* \rangle = \frac{\alpha}{2} \left( \|z^- - x^*\|^2 - \left( 1 + \frac{\delta}{\alpha} \right)^2 \|z^+ - x^*\|^2 \right) + \frac{1}{2\alpha} \|\mathcal{H}_y\|^2.$$

**Lemma 2** (The regularization technique [42]). *For an  $L$ -smooth and convex function  $f$  and  $\delta > 0$ , defining  $f^\delta(x) = f(x) + \frac{\delta}{2} \|x - x_0\|^2$ ,  $\forall x$  and denoting  $x_\delta^*$  as the unique minimizer of  $f^\delta$ , we have*

- (i)  $f^\delta$  is  $(L + \delta)$ -smooth and  $\delta$ -strongly convex.
- (ii)  $f^\delta(x_0) - f^\delta(x_\delta^*) \leq f(x_0) - f(x^*)$ .
- (iii)  $\|x_0 - x_\delta^*\|^2 \leq \|x_0 - x^*\|^2, \forall x^* \in \mathcal{X}^*$ .
- (iv)  $\|x_0 - x_\delta^*\|^2 \leq \frac{2}{\delta} (f(x_0) - f(x^*))$ .

*Proof.* (i) can be easily checked by the definition of  $L$ -smoothness and strong convexity. (ii) follows from  $f^\delta(x_0) = f(x_0) + \frac{\delta}{2} \|x_0 - x_0\|^2 = f(x_0)$  and  $f^\delta(x_\delta^*) \geq f(x_\delta^*) \geq f(x^*)$ . For (iii), using the strong convexity of  $f^\delta$  at  $(x^*, x_\delta^*)$ ,  $\forall x^* \in \mathcal{X}^*$ , we obtain

$$\begin{aligned} f^\delta(x^*) - f^\delta(x_\delta^*) &\geq \frac{\delta}{2} \|x^* - x_\delta^*\|^2 \\ &\Rightarrow f(x^*) + \frac{\delta}{2} \|x^* - x_0\|^2 - f(x_\delta^*) - \frac{\delta}{2} \|x_\delta^* - x_0\|^2 \geq \frac{\delta}{2} \|x^* - x_\delta^*\|^2 \\ &\Rightarrow \frac{\delta}{2} \|x_0 - x^*\|^2 - (f(x_\delta^*) - f(x^*)) \geq \frac{\delta}{2} \|x_0 - x_\delta^*\|^2 + \frac{\delta}{2} \|x^* - x_\delta^*\|^2. \end{aligned}$$

Then (iii) follows from the non-negativeness of  $f(x_\delta^*) - f(x^*)$  and  $\|x^* - x_\delta^*\|^2$ . For (iv), using the strong convexity of  $f^\delta$  at  $(x_0, x_\delta^*)$  and (ii), we have  $\|x_0 - x_\delta^*\|^2 \leq \frac{2}{\delta} (f^\delta(x_0) - f^\delta(x_\delta^*)) \leq \frac{2}{\delta} (f(x_0) - f(x^*))$ .  $\square$

### D.2 Proof to Proposition 5.1

Denoting  $\kappa_t = \frac{L + \delta_t}{\delta_t}$ , we can write the equation  $\left( 1 - \frac{p(\alpha + \delta_t)}{\alpha + L + \delta_t} \right) \left( 1 + \frac{\delta_t}{\alpha} \right)^2 = 1$  as

$$s \left( \frac{\alpha}{\delta_t} \right) \triangleq \left( \frac{\alpha}{\delta_t} \right)^3 - (2n - 3) \left( \frac{\alpha}{\delta_t} \right)^2 - (2n\kappa_t + n - 3) \left( \frac{\alpha}{\delta_t} \right) - n\kappa_t + 1 = 0.$$

606 It can be verified that  $s(2n + 2\sqrt{n\kappa_t}) > 0$  for any  $n \geq 1, \kappa_t > 1$ . Since  $s(0) < 0$  and  $s(\frac{\alpha}{\delta_t}) \rightarrow \infty$   
 607 as  $\frac{\alpha}{\delta_t} \rightarrow \infty$ , the unique positive root satisfies  $\frac{\alpha}{\delta_t} \leq 2n + 2\sqrt{n\kappa_t} = O(n + \sqrt{n\kappa_t})$ .

608 To bound  $C_{\text{IDC}}$  and  $C_{\text{IFC}}$ , it suffices to note that

$$\frac{\frac{\alpha^2}{\delta_t^2} p}{\frac{L}{\delta_t} + (1-p)(\frac{\alpha}{\delta_t} + 1)} \stackrel{(a)}{=} \frac{(\frac{\alpha}{\delta_t} + 1)^2}{n(\frac{\alpha}{\delta_t} + \kappa_t)} \stackrel{(b)}{\leq} \frac{(2n + 2\sqrt{n\kappa_t} + 1)^2}{n(2n + 2\sqrt{n\kappa_t} + \kappa_t)} \leq 6,$$

609 where (a) uses the cubic equation and (b) holds because  $\frac{x+1}{x+\kappa_t}$  increases monotonically as  $x$  increases.  
 610 Then,

$$\begin{aligned} C_{\text{IDC}} &\leq L^2 + 6L\delta_t = O((L + \delta_t)^2), \\ C_{\text{IFC}} &\leq 14L = O(L). \end{aligned}$$

### 611 D.3 Proof to Proposition 5.2

612 Using the interpolation condition (2) of  $h^{\delta_t}$  at  $(x_{\delta_t}^*, y_k)$ , we obtain

$$\begin{aligned} h^{\delta_t}(y_k) &\leq \langle \nabla h^{\delta_t}(y_k), y_k - x_{\delta_t}^* \rangle - \frac{1}{2L} \|\nabla h^{\delta_t}(y_k)\|^2 \\ &\stackrel{(a)}{\leq} \frac{1 - \tau_x}{\tau_x} \langle \nabla h^{\delta_t}(y_k), \tilde{x}_k - y_k \rangle + \frac{\tau_z}{\tau_x} \langle \nabla h^{\delta_t}(y_k), \delta_t(\tilde{x}_k - z_k) - \nabla f^{\delta_t}(\tilde{x}_k) \rangle \\ &\quad + \langle \nabla h^{\delta_t}(y_k), z_k - x_{\delta_t}^* \rangle - \frac{1}{2L} \|\nabla h^{\delta_t}(y_k)\|^2 \\ &\stackrel{(b)}{=} \frac{1 - \tau_x}{\tau_x} \langle \nabla h^{\delta_t}(y_k), \tilde{x}_k - y_k \rangle - \frac{\tau_z}{\tau_x} \langle \nabla h^{\delta_t}(y_k), \nabla h^{\delta_t}(\tilde{x}_k) \rangle \\ &\quad + \left(1 - \frac{\delta_t \tau_z}{\tau_x}\right) \langle \nabla h^{\delta_t}(y_k), z_k - x_{\delta_t}^* \rangle - \frac{1}{2L} \|\nabla h^{\delta_t}(y_k)\|^2, \end{aligned}$$

613 where (a) follows from the construction  $y_k = \tau_x z_k + (1 - \tau_x) \tilde{x}_k + \tau_z (\delta_t(\tilde{x}_k - z_k) - \nabla f^{\delta_t}(\tilde{x}_k))$   
 614 and (b) uses that  $\delta_t(\tilde{x}_k - z_k) - \nabla f^{\delta_t}(\tilde{x}_k) = \delta_t(x_{\delta_t}^* - z_k) - \nabla h^{\delta_t}(\tilde{x}_k)$ .

615 Using Lemma 1 with  $\mathcal{H}_y = \mathcal{H}_k^{\delta_t}, \mathcal{G}_y = \mathcal{G}_k^{\delta_t}, z^+ = z_{k+1}, x^* = x_{\delta_t}^*$  and taking the expectation (note  
 616 that  $\mathbb{E}_{i_k} [\mathcal{H}_k^{\delta_t}] = \nabla h^{\delta_t}(y_k)$ ), we can conclude that

$$\begin{aligned} h^{\delta_t}(y_k) &\leq \frac{1 - \tau_x}{\tau_x} \langle \nabla h^{\delta_t}(y_k), \tilde{x}_k - y_k \rangle - \frac{\tau_z}{\tau_x} \langle \nabla h^{\delta_t}(y_k), \nabla h^{\delta_t}(\tilde{x}_k) \rangle - \frac{1}{2L} \|\nabla h^{\delta_t}(y_k)\|^2 \\ &\quad + \left(1 - \frac{\delta_t \tau_z}{\tau_x}\right) \frac{\alpha}{2} \left( \|z_k - x_{\delta_t}^*\|^2 - \left(1 + \frac{\delta_t}{\alpha}\right)^2 \mathbb{E}_{i_k} [\|z_{k+1} - x_{\delta_t}^*\|^2] \right) \\ &\quad + \left(1 - \frac{\delta_t \tau_z}{\tau_x}\right) \frac{1}{2\alpha} \mathbb{E}_{i_k} [\|\mathcal{H}_k^{\delta_t}\|^2]. \end{aligned}$$

617 To bound the shifted moment, we use the interpolation condition (2) of  $h_{i_k}^{\delta_t}$  at  $(\tilde{x}_k, y_k)$ , that is

$$\begin{aligned} \mathbb{E}_{i_k} [\|\mathcal{H}_k^{\delta_t}\|^2] &= \mathbb{E}_{i_k} \left[ \left\| \nabla h_{i_k}^{\delta_t}(y_k) - \nabla h_{i_k}^{\delta_t}(\tilde{x}_k) \right\|^2 \right] + 2 \langle \nabla h^{\delta_t}(y_k), \nabla h^{\delta_t}(\tilde{x}_k) \rangle \\ &\quad - \|\nabla h^{\delta_t}(\tilde{x}_k)\|^2 \\ &\leq 2L(h^{\delta_t}(\tilde{x}_k) - h^{\delta_t}(y_k) - \langle \nabla h^{\delta_t}(y_k), \tilde{x}_k - y_k \rangle) \\ &\quad + 2 \langle \nabla h^{\delta_t}(y_k), \nabla h^{\delta_t}(\tilde{x}_k) \rangle - \|\nabla h^{\delta_t}(\tilde{x}_k)\|^2. \end{aligned}$$

618 Re-arrange the terms.

$$\begin{aligned}
h^{\delta_t}(y_k) &\leq \left(1 - \frac{\delta_t \tau_z}{\tau_x}\right) \frac{L}{\alpha} (h^{\delta_t}(\tilde{x}_k) - h^{\delta_t}(y_k)) \\
&\quad + \left(\frac{1 - \tau_x}{\tau_x} - \left(1 - \frac{\delta_t \tau_z}{\tau_x}\right) \frac{L}{\alpha}\right) \langle \nabla h^{\delta_t}(y_k), \tilde{x}_k - y_k \rangle \\
&\quad + \left(1 - \frac{\delta_t \tau_z}{\tau_x}\right) \frac{\alpha}{2} \left( \|z_k - x_{\delta_t}^*\|^2 - \left(1 + \frac{\delta_t}{\alpha}\right)^2 \mathbb{E}_{i_k} [\|z_{k+1} - x_{\delta_t}^*\|^2] \right) \\
&\quad + \left(\frac{1}{\alpha} - \frac{\delta_t \tau_z}{\alpha \tau_x} - \frac{\tau_z}{\tau_x}\right) \langle \nabla h^{\delta_t}(y_k), \nabla h^{\delta_t}(\tilde{x}_k) \rangle - \frac{1}{2L} \|\nabla h^{\delta_t}(y_k)\|^2 \\
&\quad - \left(\frac{1}{2\alpha} - \frac{\delta_t \tau_z}{2\alpha \tau_x}\right) \|\nabla h^{\delta_t}(\tilde{x}_k)\|^2.
\end{aligned}$$

619 The choice of  $\tau_z$  in Proposition 5.1 ensures that  $\frac{1 - \tau_x}{\tau_x} = \left(1 - \frac{\delta_t \tau_z}{\tau_x}\right) \frac{L}{\alpha}$ , which leads to

$$\begin{aligned}
h^{\delta_t}(y_k) &\leq (1 - \tau_x) h^{\delta_t}(\tilde{x}_k) + \frac{\alpha^2(1 - \tau_x)}{2L} \left( \|z_k - x_{\delta_t}^*\|^2 - \left(1 + \frac{\delta_t}{\alpha}\right)^2 \mathbb{E}_{i_k} [\|z_{k+1} - x_{\delta_t}^*\|^2] \right) \\
&\quad + \frac{\alpha + \delta_t - (\alpha + L + \delta_t)\tau_x}{L\delta_t} \langle \nabla h^{\delta_t}(y_k), \nabla h^{\delta_t}(\tilde{x}_k) \rangle - \frac{\tau_x}{2L} \|\nabla h^{\delta_t}(y_k)\|^2 \\
&\quad - \frac{1 - \tau_x}{2L} \|\nabla h^{\delta_t}(\tilde{x}_k)\|^2.
\end{aligned} \tag{26}$$

620 Substitute the choice  $\tau_x = \frac{\alpha + \delta_t}{\alpha + L + \delta_t}$ .

$$\begin{aligned}
h^{\delta_t}(y_k) &\leq \frac{L}{\alpha + L + \delta_t} h^{\delta_t}(\tilde{x}_k) \\
&\quad + \frac{\alpha^2}{2(\alpha + L + \delta_t)} \left( \|z_k - x_{\delta_t}^*\|^2 - \left(1 + \frac{\delta_t}{\alpha}\right)^2 \mathbb{E}_{i_k} [\|z_{k+1} - x_{\delta_t}^*\|^2] \right).
\end{aligned}$$

621 Note that by construction,  $\mathbb{E}[h^{\delta_t}(\tilde{x}_{k+1})] = p\mathbb{E}[h^{\delta_t}(y_k)] + (1 - p)\mathbb{E}[h^{\delta_t}(\tilde{x}_k)]$ , and thus

$$\begin{aligned}
\mathbb{E}[h^{\delta_t}(\tilde{x}_{k+1})] &\leq \left(1 - \frac{p(\alpha + \delta_t)}{\alpha + L + \delta_t}\right) \mathbb{E}[h^{\delta_t}(\tilde{x}_k)] \\
&\quad + \frac{\alpha^2 p}{2(\alpha + L + \delta_t)} \left( \mathbb{E}[\|z_k - x_{\delta_t}^*\|^2] - \left(1 + \frac{\delta_t}{\alpha}\right)^2 \mathbb{E}[\|z_{k+1} - x_{\delta_t}^*\|^2] \right).
\end{aligned}$$

622 Since  $\alpha$  is chosen as the positive root of  $\left(1 - \frac{p(\alpha + \delta_t)}{\alpha + L + \delta_t}\right) \left(1 + \frac{\delta_t}{\alpha}\right)^2 = 1$ , defining the potential  
623 function

$$T_k \triangleq \mathbb{E}[h^{\delta_t}(\tilde{x}_k)] + \frac{\alpha^2 p}{2(L + (1 - p)(\alpha + \delta_t))} \mathbb{E}[\|z_k - x_{\delta_t}^*\|^2], \tag{27}$$

624 we have  $T_{k+1} \leq \left(1 + \frac{\delta_t}{\alpha}\right)^{-2} T_k$ .

625 Thus, at iteration  $k$ , the following holds,

$$\begin{aligned}
\mathbb{E}[h^{\delta_t}(\tilde{x}_k)] &\leq \left(1 + \frac{\delta_t}{\alpha}\right)^{-2k} \left( h^{\delta_t}(x_0) + \frac{\alpha^2 p}{2(L + (1 - p)(\alpha + \delta_t))} \|x_0 - x_{\delta_t}^*\|^2 \right) \\
&\leq \left(1 + \frac{\delta_t}{\alpha}\right)^{-2k} \left( f^{\delta_t}(x_0) - f^{\delta_t}(x_{\delta_t}^*) + \frac{\alpha^2 p}{2(L + (1 - p)(\alpha + \delta_t))} \|x_0 - x_{\delta_t}^*\|^2 \right) \\
&\stackrel{(*)}{\leq} \left(1 + \frac{\delta_t}{\alpha}\right)^{-2k} \left( f(x_0) - f(x^*) + \frac{\alpha^2 p}{2(L + (1 - p)(\alpha + \delta_t))} \|x_0 - x_{\delta_t}^*\|^2 \right),
\end{aligned}$$

626 where  $(\star)$  uses Lemma 2 (ii).

627 Note that using the interpolation condition (2), we have

$$\begin{aligned}
\mathbb{E} [h^{\delta_t}(\tilde{x}_k)] &\geq \frac{1}{2L} \mathbb{E} [\|\nabla h^{\delta_t}(\tilde{x}_k)\|^2] \\
&= \frac{1}{2L} \mathbb{E} [\|\nabla f^{\delta_t}(\tilde{x}_k) - \delta_t(\tilde{x}_k - x_{\delta_t}^*)\|^2] \\
&= \frac{1}{2L} \mathbb{E} [\|\nabla f(\tilde{x}_k) + \delta_t(\tilde{x}_k - x_0) - \delta_t(\tilde{x}_k - x_{\delta_t}^*)\|^2] \\
&= \frac{1}{2L} \mathbb{E} [\|\nabla f(\tilde{x}_k) - \delta_t(x_0 - x_{\delta_t}^*)\|^2] \\
&\geq \frac{1}{2L} \mathbb{E} [\|\nabla f(\tilde{x}_k) - \delta_t(x_0 - x_{\delta_t}^*)\|]^2.
\end{aligned}$$

628 Finally, we conclude that

$$\begin{aligned}
\mathbb{E} [\|\nabla f(\tilde{x}_k)\|] &\leq \delta_t \|x_0 - x_{\delta_t}^*\| \\
&\quad + \left(1 + \frac{\delta_t}{\alpha}\right)^{-k} \sqrt{2L(f(x_0) - f(x^*)) + \frac{L\alpha^2 p}{L + (1-p)(\alpha + \delta_t)}} \|x_0 - x_{\delta_t}^*\|^2. \quad (28)
\end{aligned}$$

629 **Under IDC:** Invoking Lemma 2 (iii) to upper bound (28), we obtain that for any  $x^* \in \mathcal{X}^*$ ,

$$\mathbb{E} [\|\nabla f(\tilde{x}_k)\|] \leq \left(\delta_t + \left(1 + \frac{\delta_t}{\alpha}\right)^{-k} \sqrt{L^2 + \frac{L\alpha^2 p}{L + (1-p)(\alpha + \delta_t)}}\right) \|x_0 - x^*\|.$$

630 **Under IFC:** Invoking Lemma 2 (iv) to upper bound (28), we can conclude that

$$\mathbb{E} [\|\nabla f(\tilde{x}_k)\|] \leq \left(\sqrt{2\delta_t} + \left(1 + \frac{\delta_t}{\alpha}\right)^{-k} \sqrt{2L + \frac{2L\alpha^2 p}{(L + (1-p)(\alpha + \delta_t))\delta_t}}\right) \sqrt{f(x_0) - f(x^*)}.$$

#### 631 D.4 Proof to Theorem 5.1

632 (i) At outer iteration  $\ell$ , if Algorithm 4 breaks the inner loop (Step 10) at iteration  $k$ , by construction,  
633 we have  $(1 + \frac{\delta_\ell}{\alpha})^{-k} \sqrt{C_{\text{IDC}}} \leq \delta_\ell$ . Then, from Proposition 5.2 (i),

$$\mathbb{E} [\|\nabla f(\tilde{x}_k)\|] \leq 2\delta_\ell R_0 \stackrel{(\star)}{\leq} \epsilon q,$$

634 where  $(\star)$  uses  $\delta_\ell \leq \delta_{\text{IDC}}^*$ . By Markov's inequality, it holds that

$$\text{Prob} \{\|\nabla f(\tilde{x}_k)\| \geq \epsilon\} \leq \frac{\mathbb{E} [\|\nabla f(\tilde{x}_k)\|]}{\epsilon} \leq q,$$

635 which means that with probability at least  $1 - q$ , Algorithm 4 terminates at iteration  $k$  (Step 9) before  
636 reaching Step 10.

637 (ii) Note that the expected gradient complexity of each inner iteration is  $p(n+2) + (1-p)2 = np+2$ .  
638 Then, for an inner loop that breaks at Step 10, its expected complexity is

$$\mathbb{E} [\#\text{grad}_t] \leq (np+2) \left(\frac{\alpha}{\delta_t} + 1\right) \log \frac{\sqrt{C_{\text{IDC}}}}{\delta_t}.$$

639 Substituting the choices in Proposition 5.1, we obtain

$$\mathbb{E} [\#\text{grad}_t] = O \left( \left( n + \sqrt{\frac{nL}{\delta_t}} \right) \log \frac{L + \delta_t}{\delta_t} \right).$$

640 Thus, the total expected complexity before Algorithm 4 terminates with high probability at outer  
641 iteration  $\ell$  is at most (note that  $\delta_t = \delta_0/\beta^t$ )

$$\sum_{t=0}^{\ell} \mathbb{E} [\#\text{grad}_t] = O \left( \left( \ell n + \frac{1}{\sqrt{\beta}-1} \sqrt{\frac{nL\beta}{\delta_\ell}} \right) \log \frac{L + \delta_\ell}{\delta_\ell} \right).$$

642 Since outer iteration  $\ell > 0$  is the first time  $\delta_\ell \leq \delta_{\text{IDC}}^*$ , we have  $\delta_\ell \leq \delta_{\text{IDC}}^* \leq \delta_\ell \beta$ . Moreover, noting  
 643 that  $\ell = O(\log \frac{\delta_0}{\delta_\ell})$  and  $\delta_0 = L$ , we can conclude that (omitting  $\beta$ )

$$\begin{aligned} \sum_{t=0}^{\ell} \mathbb{E} [\# \text{grad}_t] &= O \left( \left( n \log \frac{\delta_0}{\delta_\ell} + \sqrt{\frac{nL}{\delta_\ell}} \right) \log \frac{L + \delta_\ell}{\delta_\ell} \right) \\ &= O \left( \left( n \log \frac{LR_0}{\epsilon q} + \sqrt{\frac{nLR_0}{\epsilon q}} \right) \log \frac{LR_0}{\epsilon q} \right). \end{aligned}$$

## 644 D.5 Proof to Theorem 5.2

645 (i) At outer iteration  $\ell$ , if Algorithm 4 breaks the inner loop (Step 11) at iteration  $k$ , by construction,  
 646 we have  $(1 + \frac{\delta_\ell}{\alpha})^{-k} \sqrt{C_{\text{IFC}}} \leq \sqrt{2\delta_\ell}$ . Then, from Proposition 5.2 (ii),

$$\mathbb{E} [\|\nabla f(\tilde{x}_k)\|] \leq \sqrt{8\delta_\ell \Delta_0}^{(\star)} \leq \epsilon q,$$

647 where  $(\star)$  uses  $\delta_\ell \leq \delta_{\text{IFC}}^*$ . By Markov's inequality, it holds that

$$\text{Prob} \{ \|\nabla f(\tilde{x}_k)\| \geq \epsilon \} \leq \frac{\mathbb{E} [\|\nabla f(\tilde{x}_k)\|]}{\epsilon} \leq q,$$

648 which means that with probability at least  $1 - q$ , Algorithm 4 terminates at iteration  $k$  (Step 9) before  
 649 reaching Step 11.

650 (ii) Note that the expected gradient complexity of each inner iteration is  $p(n+2) + (1-p)2 = np+2$ .  
 651 Then, for an inner loop that breaks at Step 11, its expected complexity is

$$\mathbb{E} [\# \text{grad}_t] \leq (np+2) \left( \frac{\alpha}{\delta_t} + 1 \right) \log \sqrt{\frac{C_{\text{IFC}}}{2\delta_t}}.$$

652 Substituting the choices in Proposition 5.1, we obtain

$$\mathbb{E} [\# \text{grad}_t] = O \left( \left( n + \sqrt{\frac{nL}{\delta_t}} \right) \log \frac{L}{\delta_t} \right).$$

653 Thus, the total expected complexity before Algorithm 4 terminates with high probability at outer  
 654 iteration  $\ell$  is at most (note that  $\delta_t = \delta_0 / \beta^t$ )

$$\sum_{t=0}^{\ell} \mathbb{E} [\# \text{grad}_t] = O \left( \left( \ell n + \frac{1}{\sqrt{\beta}-1} \sqrt{\frac{nL\beta}{\delta_\ell}} \right) \log \frac{L}{\delta_\ell} \right).$$

655 Since outer iteration  $\ell > 0$  is the first time  $\delta_\ell \leq \delta_{\text{IFC}}^*$ , we have  $\delta_\ell \leq \delta_{\text{IFC}}^* \leq \delta_\ell \beta$ . Moreover, noting  
 656 that  $\ell = O(\log \frac{\delta_0}{\delta_\ell})$  and  $\delta_0 = L$ , we can conclude that (omitting  $\beta$ )

$$\begin{aligned} \sum_{t=0}^{\ell} \mathbb{E} [\# \text{grad}_t] &= O \left( \left( n \log \frac{\delta_0}{\delta_\ell} + \sqrt{\frac{nL}{\delta_\ell}} \right) \log \frac{L}{\delta_\ell} \right) \\ &= O \left( \left( n \log \frac{\sqrt{L\Delta_0}}{\epsilon q} + \frac{\sqrt{nL\Delta_0}}{\epsilon q} \right) \log \frac{\sqrt{L\Delta_0}}{\epsilon q} \right). \end{aligned}$$

## 657 E Katyusha + L2S

658 By applying AdaptReg on Katyusha, Allen-Zhu [1] showed that the scheme outputs a point  $x_{s_1}$   
 659 satisfying  $\mathbb{E} [f(x_{s_1})] - f(x^*) \leq \epsilon_1$  in

$$O \left( n \log \frac{LR_0^2}{\epsilon_1} + \frac{\sqrt{nLR_0}}{\sqrt{\epsilon_1}} \right),$$

660 oracle calls for any  $\epsilon_1 > 0$  (cf. Corollary 3.5 in [1]).

661 For L2S, Li et al. [37] proved that when using an  $n$ -dependent step size, its output  $x_a$  satisfies (cf.  
 662 Corollary 3 in [37])

$$\mathbb{E} [\|\nabla f(x_a)\|]^2 \leq \mathbb{E} [\|\nabla f(x_a)\|^2] = O\left(\frac{\sqrt{n}L(f(x_0) - f(x^*))}{T}\right),$$

663 after running  $T$  iterations.

664 We can combine these two rates following the ideas in [42]. Set  $\epsilon_1 = O\left(\frac{T\epsilon^2}{\sqrt{n}L}\right)$  for some  $\epsilon > 0$  and  
 665 let the input  $x_0$  of L2S be the output  $x_{s_1}$  of Katyusha. By chaining the above two results, we obtain  
 666 the guarantee  $\mathbb{E} [\|\nabla f(x_a)\|] = O(\epsilon)$  in oracle complexity

$$O\left(n + T + n \log \frac{n^{1/4}LR_0}{\sqrt{T}\epsilon} + \frac{n^{3/4}LR_0}{\sqrt{T}\epsilon}\right).$$

667 Minimizing the complexity by choosing  $T = O\left(\frac{\sqrt{n}(LR_0)^{2/3}}{\epsilon^{2/3}}\right)$ , we get the total oracle complexity

$$O\left(n \log \frac{LR_0}{\epsilon} + \frac{\sqrt{n}(LR_0)^{2/3}}{\epsilon^{2/3}}\right).$$
